# Supplementary material for: A base-promoted cascade reaction of α,β-unsaturated N-tosylhydrazones with o-hydroxybenzyl alcohols: highly regioselective synthesis of N-sec-alkylpyrazoles
Source: Royal Society of Chemistry journal article supplement (doi:10.1039/c9ob01780a), 2019-01-01
Supplement: c9ob01780a1.pdf [file c9ob01780a1.pdf]

Electronic Supplementary Material (ESI) for Organic & Biomolecular Chemistry.  
This journal is © The Royal Society of Chemistry 2019

**Base-Promoted Cascade Reaction of  $\alpha,\beta$ -Unsaturated *N*-Tosylhydrazones with *o*-Hydroxybenzyl Alcohols: Highly Regioselective Synthesis of *N*-sec-Alkylpyrazoles**

Lian-Mei Chen,<sup>\*a</sup> Juan Zhao,<sup>†b</sup> An-Jie Xia,<sup>†b</sup> Xiao-Qiang Guo,<sup>a</sup> Ya Gan,<sup>a</sup> Chuang Zhou,<sup>a</sup> Zai-Jun Yang,<sup>b</sup> Jun Yang<sup>b</sup> and Tai-Ran Kang<sup>\*ab</sup>

<sup>a</sup>College of Pharmacy and Biological Engineering, Chengdu University, Chengdu City, 610106, P. R. of China. E-mail: chenlianmei845@163.com; kangtairan@sina.com

<sup>b</sup>Collaborative Innovation Center of Tissue Repair Material of Sichuan Province, College of Chemistry & Chemical Engineering, China West Normal University, Nanchong City, Sichuan, 637002, P. R. of China.

**Table of Contents**

|                                                                 |    |
|-----------------------------------------------------------------|----|
| I-General information .....                                     | 2  |
| II-Experimental Section.....                                    | 3  |
| III-Optimization of the Reaction conditions .....               | 4  |
| IV-General Procedure .....                                      | 5  |
| V-NMR spectra for compounds.....                                | 12 |
| VI-X-ray crystal structure analysis of compound <b>4I</b> ..... | 46 |

## I-General information

$^1\text{H}$  NMR spectra were determined on a 400 MHz spectrometer in  $\text{CDCl}_3$  solution. Chemical shifts are expressed in parts per million ( $\delta$ ), and the signals were reported as s (singlet), d (doublet), t (triplet), m (multiplet), and coupling constants  $J$  were given in Hz.  $^{13}\text{C}$  NMR spectra were recorded at 100 MHz in  $\text{CDCl}_3$  solution. Chemical shifts are expressed in parts per million ( $\delta$ ) and are referenced to  $\text{CDCl}_3$  ( $\delta = 77.16$ ) as an internal standard. TLC was done on silica gel coated glass slide (Silica gel G for TLC). Silica gel (60-120 mesh) was used for column chromatography. Petroleum ether refers to the fraction boiling in the range of 60-90 °C unless otherwise mentioned. All solvents were dried and distilled before use. Commercially available substrates were freshly distilled before the reaction. Solvents, reagents and chemicals were commercially purchased. All reactions involving moisture sensitive reactants were executed using oven-dried glassware. The  $\alpha,\beta$ -unsaturated tosylhydrazones **1** and ortho-hydroxymethyl phenols **2** were synthesized according to the reported procedure.<sup>1-4</sup> The relative configuration of **4I** was assigned by the X-ray analysis.

## II-Experimental Section

### 1. Synthesis of $\alpha,\beta$ -unsaturated tosylhydrazones **1**

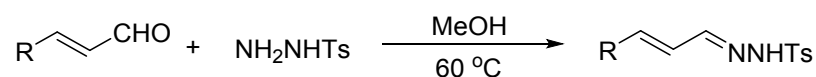

$\alpha,\beta$ -unsaturated tosylhydrazones were prepared according to literature procedure.<sup>3</sup>

A solution of pure 4-methylbenzenesulfonylhydrazide (5 mmol) in methanol (5 mL) was stirred and heated to 60 °C until the 4-methylbenzenesulfonylhydrazide was completely dissolved. Then  $\alpha,\beta$ -unsaturated aldehydes were slowly dropped to the mixture. After approximately 30 min, the crude products as precipitates were obtained. The precipitates were washed by petroleum ether and dried in *vacuo* to afford the pure products **1a-k**.

### 2. Synthesis of *ortho*-hydroxymethyl phenols **2**

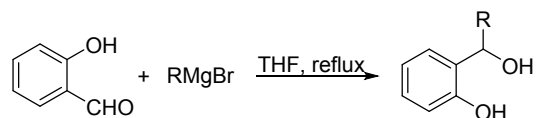

**General procedure for *ortho*-hydroxymethyl phenols.**<sup>4</sup> RMgBr (2.0 equiv) was added into a solution of salicylaldehyde (1 equiv) in THF at 0 °C. The mixture was refluxed for about 5 hours. The reaction was quenched with 2mL saturated  $\text{NH}_4\text{Cl}$  solution, and the mixture solution was transferred to a separatory funnel. The aqueous layer was extracted with 4mL EtOAc. The organic layer was separated. The combined organic layers were dried over  $\text{Na}_2\text{SO}_4$  and concentrated under reduced pressure. The residue was purified by recrystallization to provide the desired products **2** (40-80% yields).

### III-Optimization of the Reaction conditions

**Table 1.** Optimization of reaction conditions

| 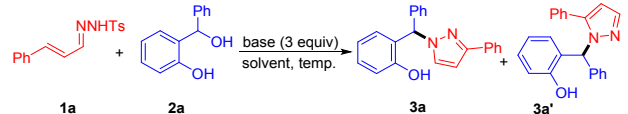 |                                 |                                       |                           |                     |
|-----------------------------------------------------------------------------------|---------------------------------|---------------------------------------|---------------------------|---------------------|
| entry <sup>a</sup>                                                                | base                            | solvent/temp(°C)                      | 3a yield (%) <sup>b</sup> | 3a/3a' <sup>c</sup> |
| 1                                                                                 | Cs <sub>2</sub> CO <sub>3</sub> | 1,4-dioxane/60                        | 70                        | >20:1               |
| 2                                                                                 | K <sub>2</sub> CO <sub>3</sub>  | 1,4-dioxane/60                        | 68                        | >20:1               |
| 3                                                                                 | Na <sub>2</sub> CO <sub>3</sub> | 1,4-dioxane/60                        | 55                        | >20:1               |
| 4                                                                                 | Cs <sub>2</sub> CO <sub>3</sub> | THF/60                                | 62                        | >20:1               |
| 5                                                                                 | Cs <sub>2</sub> CO <sub>3</sub> | Toluene/60                            | 48                        | >20:1               |
| 6                                                                                 | Cs <sub>2</sub> CO <sub>3</sub> | (CH <sub>2</sub> Cl) <sub>2</sub> /60 | 23                        | >20:1               |
| 7 <sup>[d]</sup>                                                                  | Cs <sub>2</sub> CO <sub>3</sub> | 1,4-dioxane/90                        | 92                        | >20:1               |

<sup>a</sup>Reaction conditions:  $\alpha,\beta$ -unsaturated *N*-tosylhydrazone **1a** (0.22 mmol, 1.1 equiv), *ortho*-hydroxybenzyl alcohol **2a** (0.2 mmol, 1 equiv), base (0.6 mmol, 3.0 equiv) in 1 mL solvent for 12 hours. <sup>b</sup>Isolated yield. <sup>c</sup>Determined by <sup>1</sup>H NMR analysis of the crude reaction mixture. <sup>d</sup>For 4 hours.

#### <sup>1</sup>H NMR spectroscopy of the crude reaction mixture (1a)

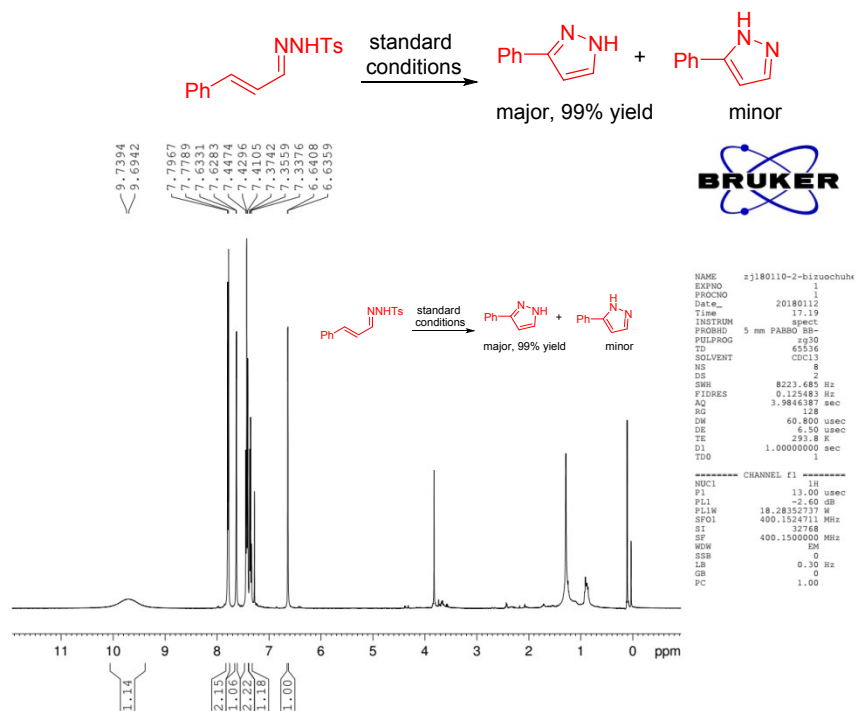

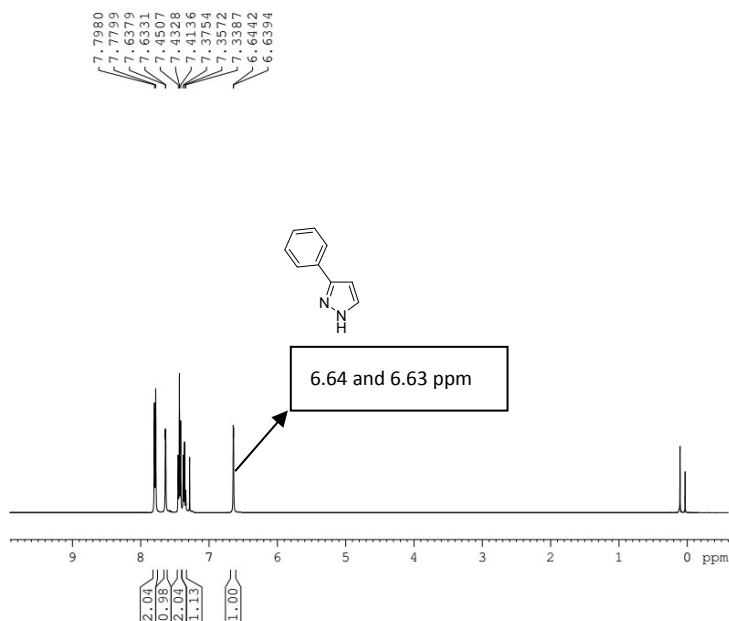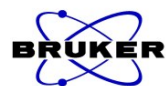

```

NAME      xaj151023-rouguiq
EXPNO     1
PROCNO    1
Date_     20180120
Time      15.21
INSTRUM    spect
PROBHD     5 mm PABBO BB-
PULPROG    zg30
TD         65536
SOLVENT    CDCl3
NS         8
DS         2
SWH         8223.685 Hz
FIDRES     0.125483 Hz
AQ         3.9846387 sec
RG         80.6
DM         60.800 uS
DE         6.50 uS
TE         293.4 K
D1         1.00000000 sec
TD0        1
  
```

```

----- CHANNEL f1 -----
NUC1       1H
P1         13.00 uS
PL1        -2.60 dB
PL1W       18.28152737 W
SFO1       400.1524711 MHz
SI         32768
SF         400.1500000 MHz
WDW         EM
SSB         0
LB         0.30 Hz
GB         0
PC         1.00
  
```

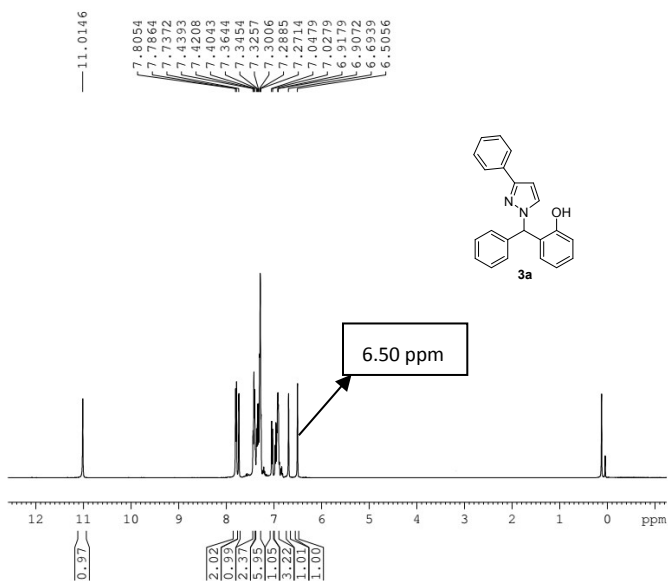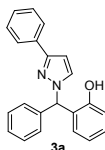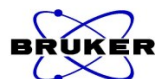

```

NAME      xaj151007-2
EXPNO     1
PROCNO    1
Date_     20151007
Time      19.00
INSTRUM    spect
PROBHD     5 mm PABBO BB-
PULPROG    zg30
TD         65536
SOLVENT    CDCl3
NS         16
DS         0
SWH         8223.685 Hz
FIDRES     0.125483 Hz
AQ         3.9846387 sec
RG         101
DM         60.800 uSec
DE         6.50 uSec
TE         297.6 K
D1         1.00000000 sec
TD0        1
  
```

```

----- CHANNEL f1 -----
NUC1       1H
P1         13.00 uSec
PL1        -2.60 dB
PL1W       17.82643890 W
SFO1       400.1524711 MHz
SI         32768
SF         400.1500000 MHz
WDW         EM
SSB         0
LB         0.30 Hz
GB         0
PC         1.00
  
```

## **<sup>1</sup>H NMR spectroscopy of the crude reaction mixture (1a +2a)**

Zj171226-chun-xizong  
Zj171226

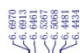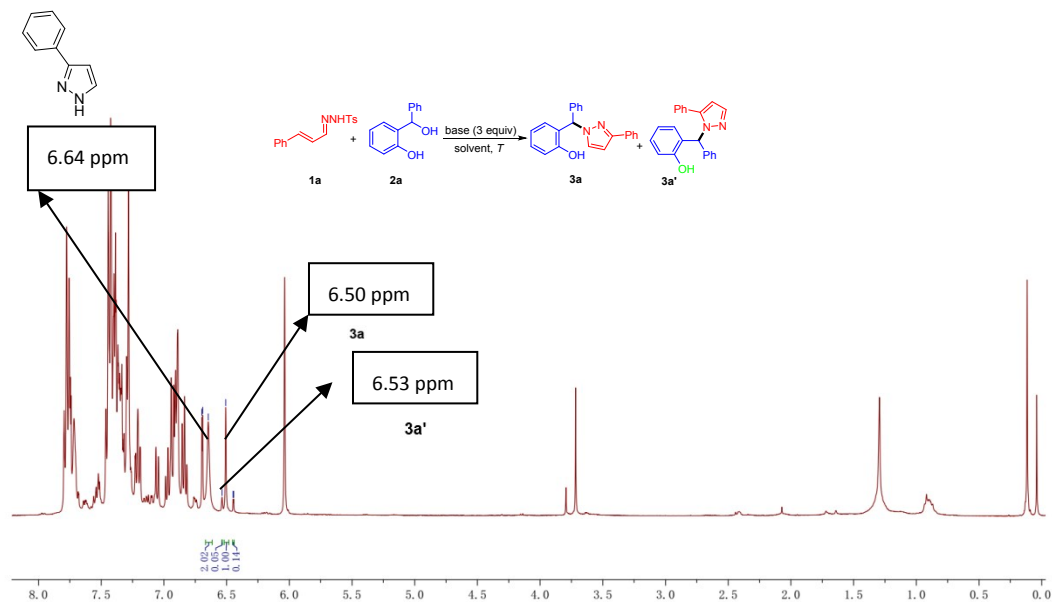

the value of 3a/3a' was about > 20:1.

## IV- General Procedure

### 1. Procedure for the cascade Reaction

$\alpha,\beta$ -unsaturated *N*-tosylhydrazones **1** (0.22 mmol), *ortho*-hydroxymethyl phenols **2** (0.2 mmol),  $\text{Cs}_2\text{CO}_3$  (0.6 mmol) and 1,4-dioxane (1 mL) were added into a tube. The mixture was stirred at 90 °C for 4-8 hours. After cooling to room temperature, the mixture was quenched with  $\text{NH}_4\text{Cl}$  saturated aqueous solution (2 mL) and extracted with  $\text{CH}_2\text{Cl}_2$  ( $3 \times 2$  mL). The combined organic phase was dried over  $\text{Na}_2\text{SO}_4$ , and then organic solvents were removed in *vacuo*. The residue was purified by flash column chromatography on silica gel with ethyl acetate/petroleum ether (1:15-1:10, V/V) as the eluent, affording the desired products **3** and **4**, which were characterized by  $^1\text{H}$  and  $^{13}\text{C}$  NMR spectroscopy, HRMS.

### 2. Procedure for the gram scale reaction (for Scheme 5)

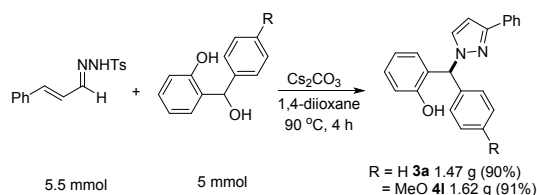

$\alpha,\beta$ -unsaturated tosylhydrazones **1** (5.5 mmol), *ortho*-hydroxymethyl phenols **2** (5 mmol),  $\text{Cs}_2\text{CO}_3$  (15 mmol) were suspended in 1,4-dioxane (10 mL) in a flask. The resulting solution was stirred at 90 °C for 4 h. After cooling to room temperature, the mixture was quenched with  $\text{NH}_4\text{Cl}$  saturated aqueous solution (40 mL) and extracted with  $\text{CH}_2\text{Cl}_2$  ( $3 \times 40$  mL). The combined organic phase was dried over  $\text{Na}_2\text{SO}_4$ , and then the solvent was removed in *vacuo* to give a residue. The residue was purified by flash column chromatography (EtOAc/hexane) to give the compounds **3a** (90% yield) or **4I** (91% yield).

### 3. Synthesis of compound 5 (for Scheme 4)

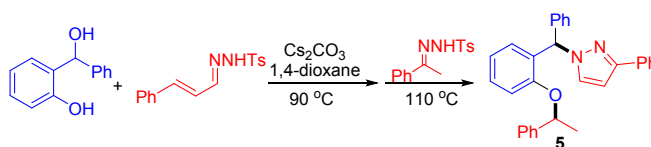

The compound **5** was prepared according to the reported literature procedure.<sup>5</sup>

$\alpha,\beta$ -unsaturated tosylhydrazones **1** (0.11 mmol), *ortho*-hydroxymethyl phenols **2** (0.1 mmol),

$\text{Cs}_2\text{CO}_3$  (0.4 mmol) and 1,4-dioxane (0.5 mL) were added into a tube. The mixture was stirred at 90 °C for 4 h. Next, (E)-4-methyl-N'-(1-phenylethylidene)benzenesulfonohydrazide (0.1 mmol) was added. The system was heated at 110 °C with stirring and refluxing. After the reaction was completed, the reaction mixture was cooled to room temperature, and the solvent was eliminated under reduced pressure. 2mL NaOH solution (2M) and 2mL dichloromethane were added to the residue. The aqueous phase was extracted three times with dichloromethane. The combined organic layer was washed with brine and dried over  $\text{MgSO}_4$ . The organic solvent was removed under reduced pressure. The residue was purified by chromatography on silica gel or alumina eluted with EtOAc/hexane to afford the product **5** in 85% yield.

#### 4. Synthesis of compound **6** (for Scheme 4)

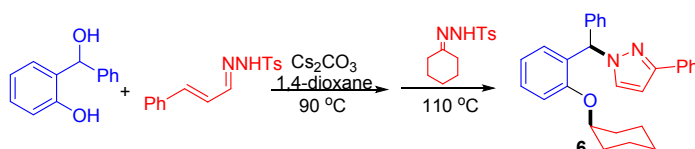

The compound **6** was prepared according to the literature procedure.<sup>5</sup>

$\alpha,\beta$ -unsaturated tosylhydrazones **1** (0.11 mmol), ortho-hydroxymethyl phenols **2** (0.1 mmol),  $\text{Cs}_2\text{CO}_3$  (0.4 mmol) and 1,4-dioxane (0.5 mL) were added into a tube. The mixture was stirred at 90 °C for 4 h. Next, (E)-4-methyl-N'-(1-phenylethylidene)benzenesulfonohydrazide (0.1 mmol) was added. The system was heated at 110 °C with stirring and refluxing. After the reaction was completed, the crude reaction mixture was cooled to room temperature. The solvent was eliminated. 2mL NaOH solution (2M) and 2mL dichloromethane were added. The layers were separated. The aqueous phase was extracted with dichloromethane three times. The combined organic layer was washed with brine and dried over  $\text{MgSO}_4$ . After the solvent was removed under reduced pressure, the residue was purified by chromatography on silica gel with EtOAc/hexane. The product **6** was obtained in 80% yield.

#### 5. Synthesis of compound **7** (for Scheme 5 b)

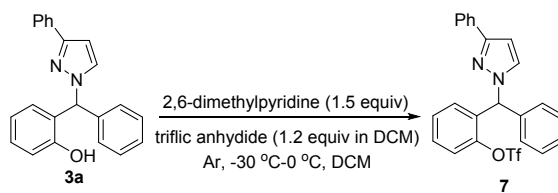

The compound **7** was synthesized according to the reported literature.<sup>6</sup>

Triflic anhydride (21.8  $\mu$ L, 0.12 mmol) in  $\text{CH}_2\text{Cl}_2$  (0.5 mL) was added to a solution of **3a** (32.6 mg, 0.1 mmol) and 2,6-lutidine (18.6  $\mu$ L, 0.15 mmol) in dry  $\text{CH}_2\text{Cl}_2$  (0.5 mL) under argon at  $-30^\circ\text{C}$  for 1 hour. And then, the reaction system reacted at  $0^\circ\text{C}$  for 1 hour. The reaction was quenched by addition of water (0.5 mL). The solution was allowed to warm to room temperature. The layers were separated. The aqueous phase was extracted with dichloromethane three times. The combined organic layer was washed with brine and dried over  $\text{MgSO}_4$ . After the solvent was removed under reduced pressure, the residue was purified by chromatography on silica gel with EtOAc/hexane. The product **7** was obtained in 95% yield.

## 6. Synthesis of compound **8** (for Scheme 5 b)

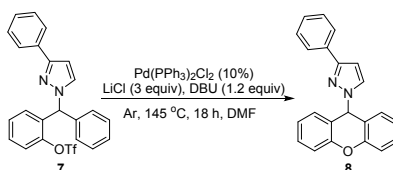

The compound **8** was prepared according to literature procedure.<sup>6</sup> A solution of **7** (45.8 mg, 0.1 mmol),  $\text{Pd}(\text{PPh}_3)_2\text{Cl}_2$  (7.01 mg, 0.01 mmol), LiCl (12.7 mg, 0.3 mmol), and DBU (18  $\mu$ L, 0.12 mmol) in dry DMF (0.5 mL), was heated at  $145^\circ\text{C}$  under argon for 18 h. After cooling, the dark brown solution was transferred to a separatory funnel. Water and ether was added. The ether layer was washed 3 times with water, dried over  $\text{MgSO}_4$ , and evaporated to dryness. The residue was chromatographed on a column of silica gel eluted with EtOAc/hexane to **8** (60% yield).

## 7. Synthesis of compound **9** (for Scheme 5 b)

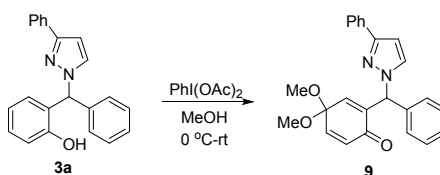

A modified literature procedure was followed.<sup>7</sup>

## 8. Some complementary experiments (for Scheme 5 a)

Chemical reaction scheme:

c1ccccc1C=CC(=O)Nc2ccccc2 + c1ccccc1N=NCc2ccccc2 >> c1ccccc1C=CC(=O)Nc2ccccc2 + c1ccccc1C=CC(=O)Nc2ccccc2

Standard conditions:  $\text{Ph-CH=CH-NNHTs} \xrightarrow{\text{standard conditions}} \text{Ph-CH=CH-NH-Ph} + \text{Ph-CH=CH-NH-Ph}$

Yields: major (>99%), minor

<sup>1</sup>H NMR spectrum (CDCl<sub>3</sub>) showing peaks at 9.7394, 9.6942, 7.7967, 7.7789, 7.7789, 7.6331, 7.6283, 7.4474, 7.4296, 7.4105, 7.3742, 7.3559, 7.3376, 6.6408, 6.6359, 1.14, 2.15, 1.06, 2.22, 1.18, 1.00 ppm.

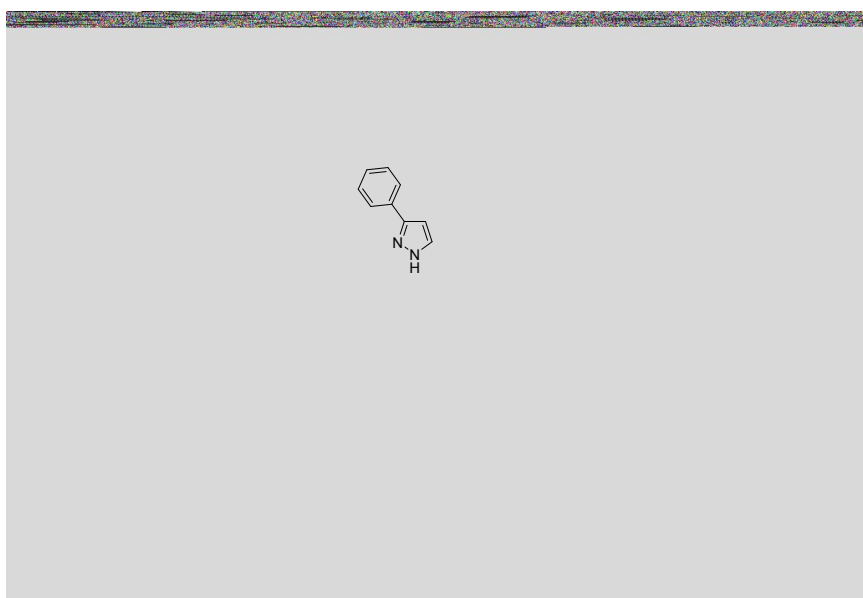

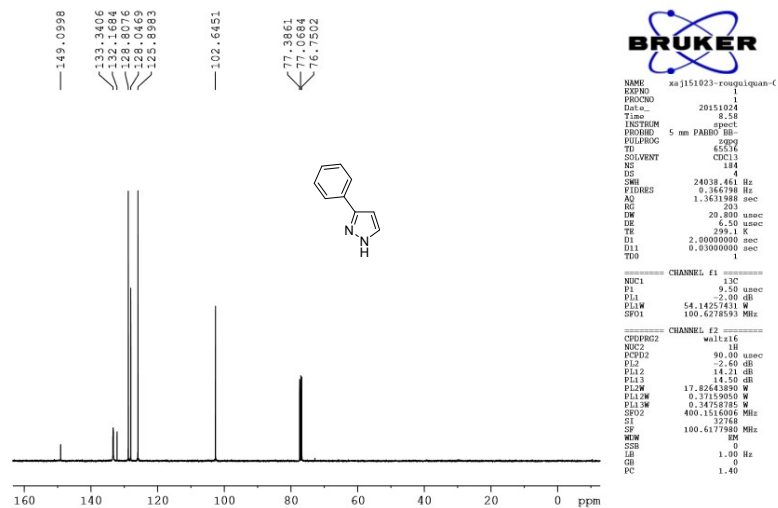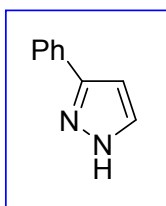

<sup>1</sup>H NMR (400 MHz, CDCl<sub>3</sub>): δ (ppm) 7.80-7.78 (m, 2H), 7.64 (d, *J* = 1.9 Hz, 1H), 7.45-7.41 (m, 2H), 7.38-7.34 (m, 1H), 6.64 (d, *J* = 1.9 Hz, 1H). <sup>13</sup>C NMR (CDCl<sub>3</sub>, 100 MHz): δ (ppm) 149.1, 133.3, 132.2, 128.8, 128.0, 125.9, 102.6.

## References

- [1] Zhu, J.; Mao, M.; Ji, H.-J.; Xu, J.-Y.; Wu, L. *Org. Lett.* **2017**, *19*, 1946-1949.
- [2] Liang, M.; Zhang, S.; Jia, J.; Tung, C.-H.; Wang, J.; Xu, Z. *Org. Lett.* **2017**, *19*, 2526-2529.
- [3] Fulton, J.; Aggarwal, V.; Vicente, J. *Eur. J. Org. Chem.* **2005**, *8*, 1479.
- [4] Fan, J.; Wang, Z. *Chem. Commun.* **2008**, 5381-5383.
- [5] Barluenga, J.; Aznar, F.; Valdes, C. *Angew. Chem., Int. Ed.* **2010**, *49*, 4993.
- [6] Wang, J.-Q.; Harvey, R. G. *Tetrahedron.* **2002**, *58*, 5927.
- [7] Yin, Z.; Zhang, J.; Wu, J.; Liu, C.; Sioson, K.; Devany, M.; Hu, C.; Zheng, S. *Org. Lett.* **2013**, *15*, 3534.

## V-NMR spectra for compounds

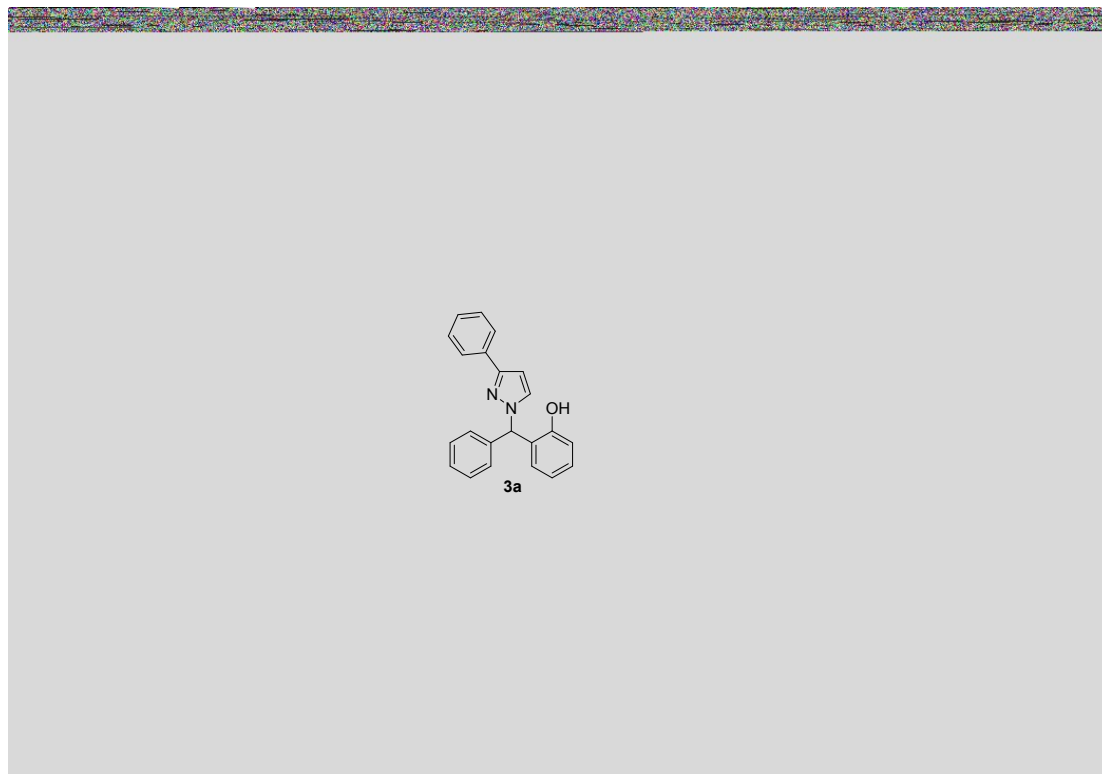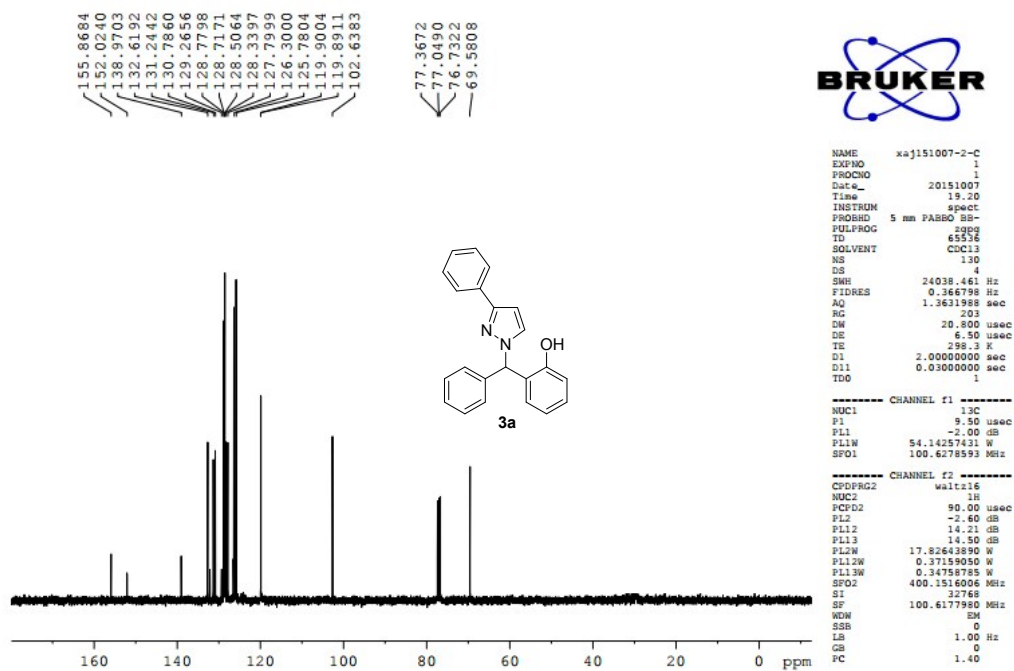

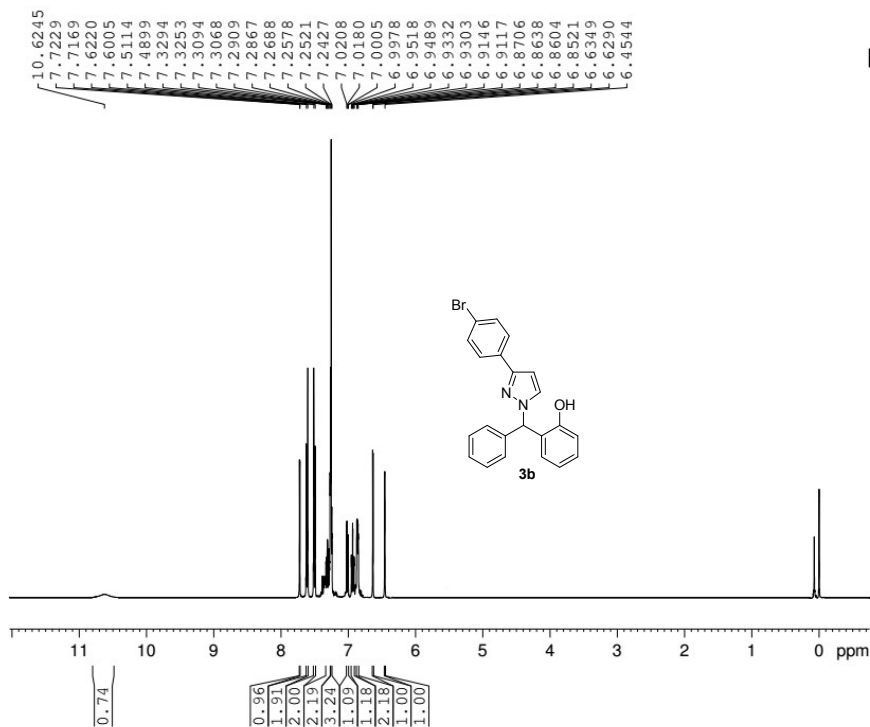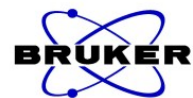

NAME 160512-4Brzong  
EXPNO 1  
PROCNO 1  
Date\_ 20160524  
Time 2.35  
INSTRUM spect  
PROBHD 5 mm PABBO BB/  
PULPROG zg30  
TD 65536  
SOLVENT CDCl<sub>3</sub>  
NS 16  
DS 2  
SWH 8012.820 Hz  
FIDRES 0.122266 Hz  
AQ 4.0894966 sec  
RG 77.71  
DW 62.400 us  
DE 6.50 us  
TE 300.0 K  
D1 1.00000000 sec  
D11 1  
D12 1

----- CHANNEL f1 -----  
SF01 400.1324710 MHz  
NUC1 1H  
P1 8.97 us  
SI 65536  
SF 400.1300128 MHz  
WDW EM  
SSB 0  
LB 0.30 Hz  
GB 0  
PC 1.00

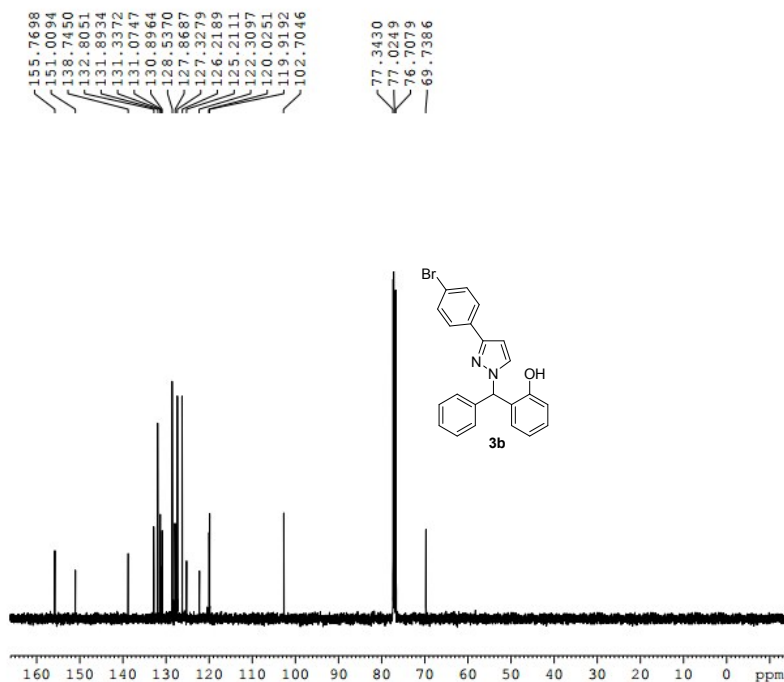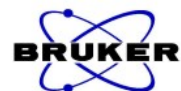

NAME 160512-4Brzong  
EXPNO 2  
PROCNO 1  
Date\_ 20160524  
Time 3.06  
INSTRUM spect  
PROBHD 5 mm PABBO BB/  
PULPROG zgpg30  
TD 65536  
SOLVENT CDCl<sub>3</sub>  
NS 512  
DS 0  
SWH 24038.461 Hz  
FIDRES 0.366798 Hz  
AQ 1.3611988 sec  
RG 194.26  
DW 20.800 us  
DE 6.50 us  
TE 300.0 K  
D1 2.00000000 sec  
D11 0.03000000 sec  
D12 1

----- CHANNEL f1 -----  
SF01 100.6228293 MHz  
NUC1 13C  
P1 8.59 us  
SI 32768  
SF 100.6127685 MHz  
WDW EM  
SSB 0  
LB 1.00 Hz  
GB 0  
PC 1.40

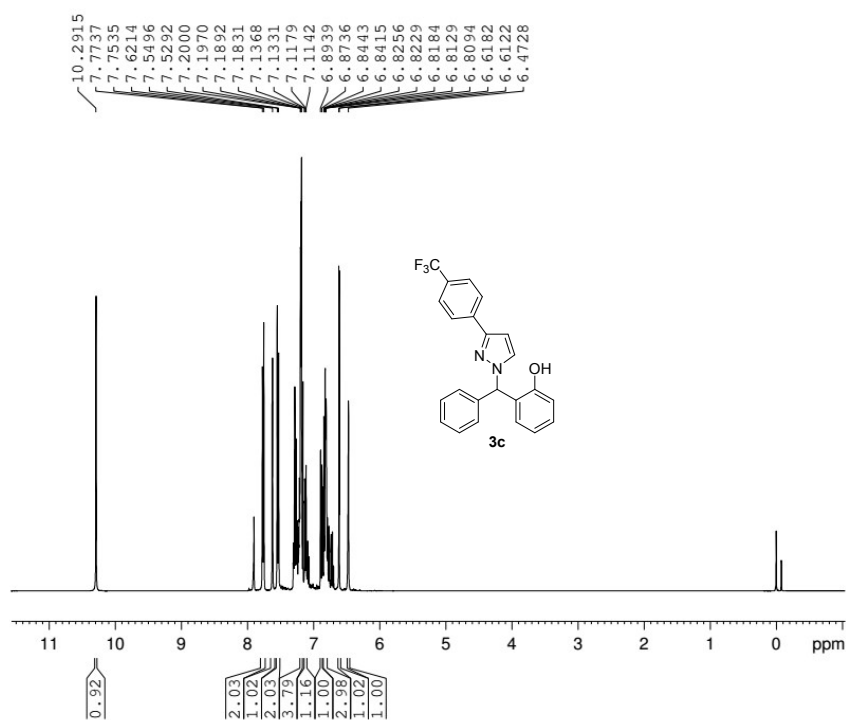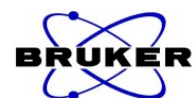

```

NAME      160730-4CF3
EXPNO     1
PROCNO    1
Date_     20160730
Time      7.47
INSTRUM   spect
PROBHD    5 mm PABBO BB/
PULPROG   zg30
TD         65536
SOLVENT   CDCl3
NS         16
DS         2
SWH        8012.820 Hz
FIDRES     0.122266 Hz
AQ         4.0894966 sec
RG         32.77
DW         62.400 uS
DE         6.50 uS
TE         300.0 K
D1         1.00000000 sec
TD0        1

----- CHANNEL f1 -----
SFO1      400.1324710 MHz
NUC1       1H
P1         8.97 uS
SI         65536
SF         400.1300491 MHz
WDW        EM
SSB        0
LB         0.30 Hz
GB         0
PC         1.00

```

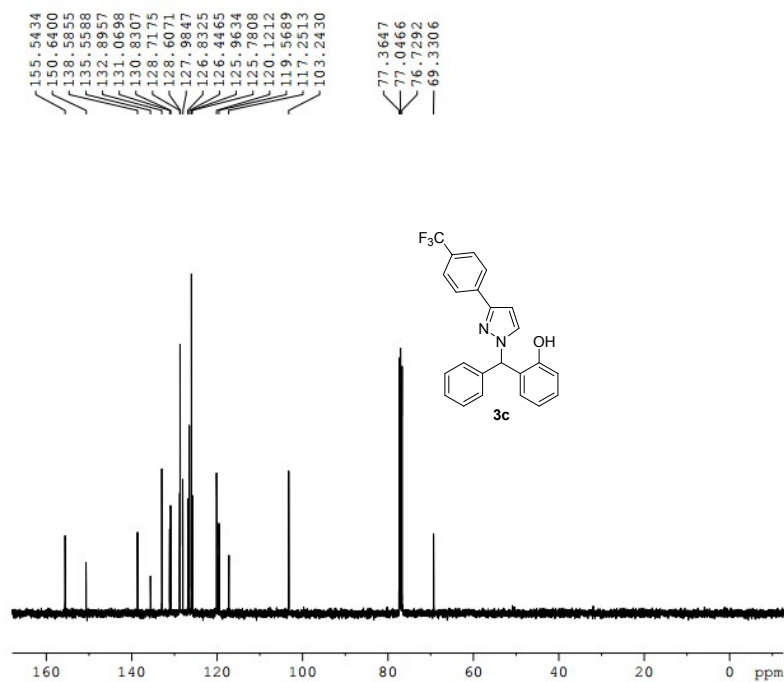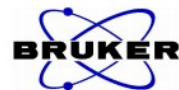

```

NAME      160730-4CF3
EXPNO     2
PROCNO    1
Date_     20160730
Time      8.03
INSTRUM   spect
PROBHD    5 mm PABBO BB/
PULPROG   zgpg30
TD         65536
SOLVENT   CDCl3
NS         256
DS         0
SWH        24038.461 Hz
FIDRES     0.366798 Hz
AQ         1.3631988 sec
RG         194.26
DW         20.800 uS
DE         6.50 uS
TE         300.0 K
D1         2.00000000 sec
D11        0.03000000 sec
TD0

----- CHANNEL f1 -----
SFO1      100.6228293 MHz
NUC1       13C
P1         8.59 uS
SI         32768
SF         100.6127685 MHz
WDW        EM
SSB        0
LB         1.00 Hz
GB         0
PC         1.40

```

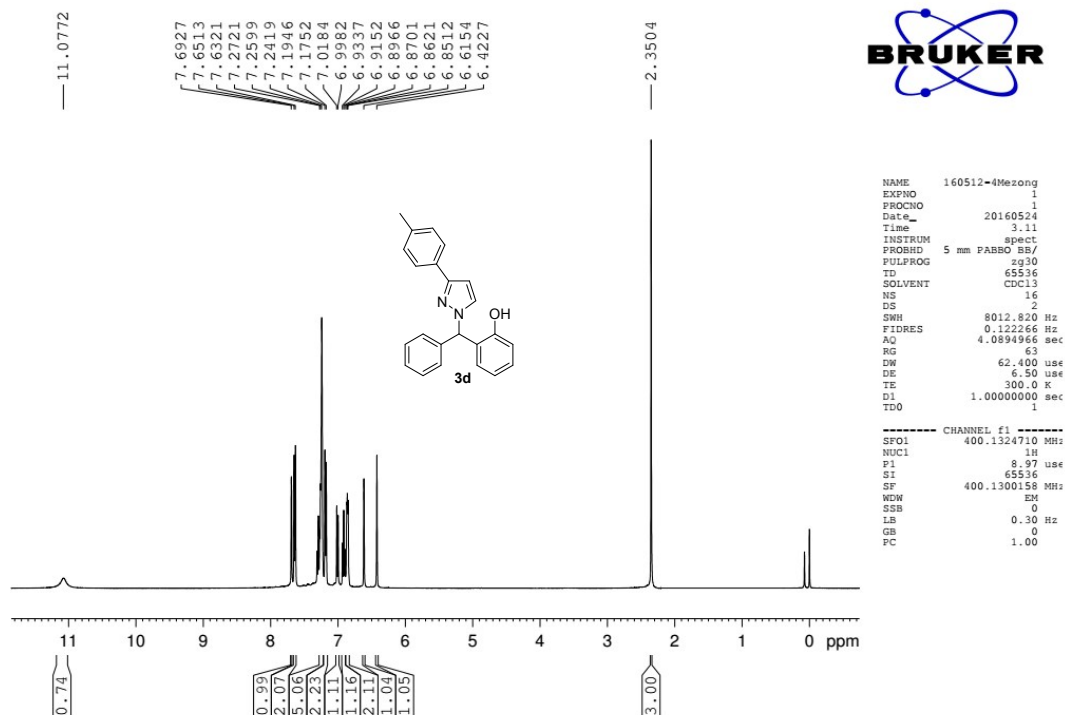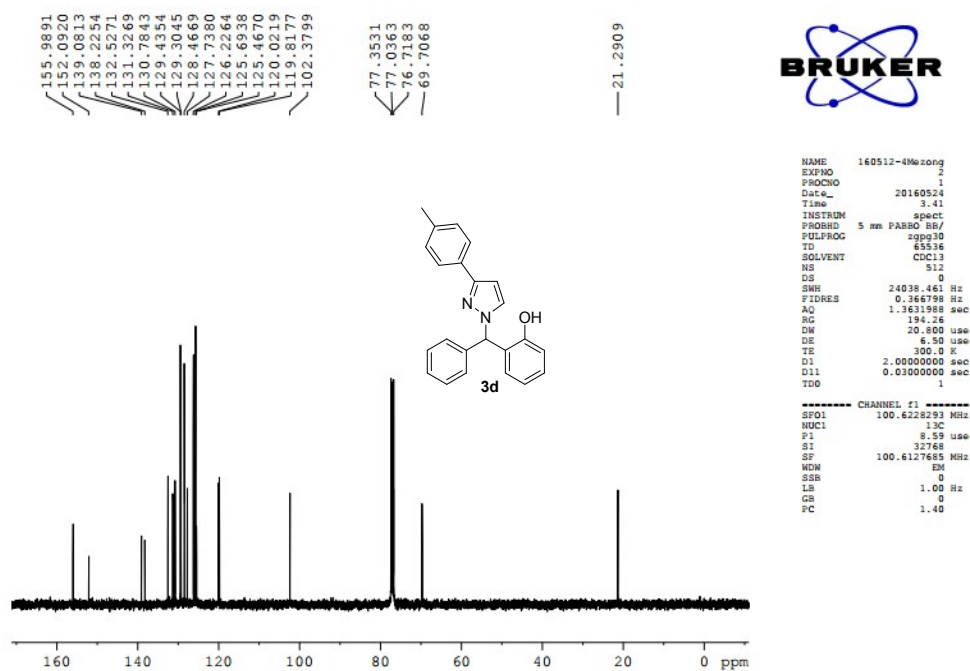

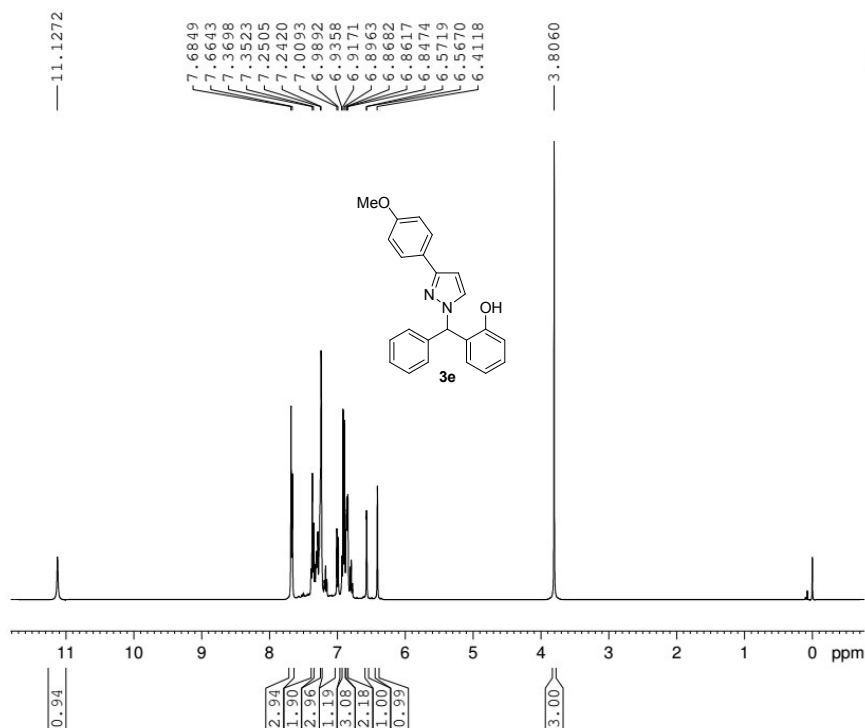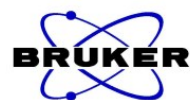

```

NAME      4e-4ome
EXPNO     1
PROCNO    1
Date_     20160329
Time      23.46
INSTRUM   spect
PROBHD    5 mm PABBO BB/
PULPROG   zg30
TD         65536
SOLVENT   CDCl3
NS         16
DS         2
SWH        8012.820 Hz
FIDRES     0.122266 Hz
AQ         4.0894966 sec
RG         32.77
DW         62.400 usec
DE         6.50 usec
TE         298.2 K
D1         1.00000000 sec
D11        0
TD0        1

```

```

----- CHANNEL f1 -----
SFO1      400.1324710 MHz
NUC1       1H
P1         8.97 usec
SI         65536
SF         400.1300164 MHz
WDW        EM
SSB        0
LB         0.30 Hz
GB         0
PC         1.00

```

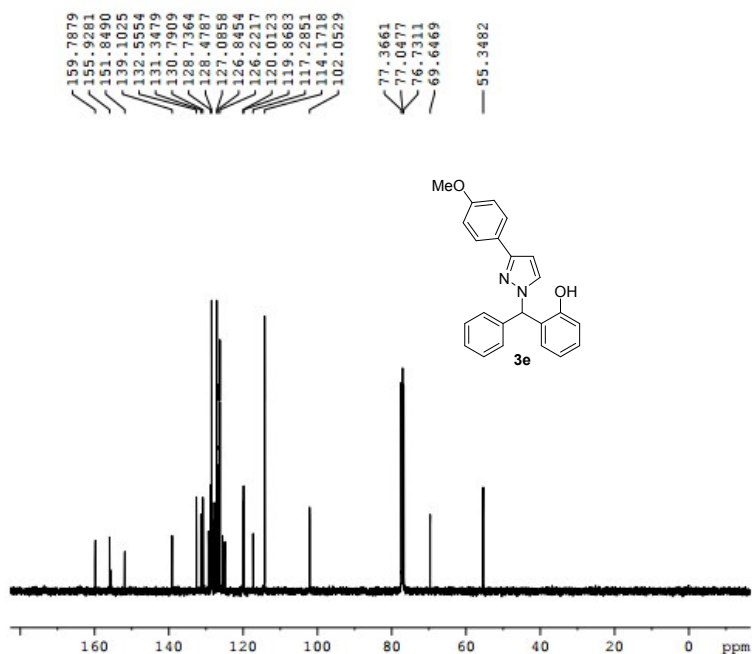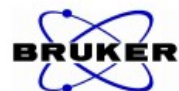

```

NAME      4e-4ome
EXPNO     2
PROCNO    1
Date_     20160330
Time      0.16
INSTRUM   spect
PROBHD    5 mm PABBO BB/
PULPROG   zgpg30
TD         65536
SOLVENT   CDCl3
NS         512
DS         4
SWH        24038.461 Hz
FIDRES     0.366798 Hz
AQ         1.3631988 sec
RG         194.26
DW         20.800 usec
DE         6.50 usec
TE         298.3 K
D1         2.00000000 sec
D11        0.03000000 sec
TD0        1

```

```

----- CHANNEL f1 -----
SFO1      100.6228293 MHz
NUC1       13C
P1         8.59 usec
SI         32768
SF         100.6127685 MHz
WDW        EM
SSB        0
LB         1.00 Hz
GB         0
PC         1.40

```

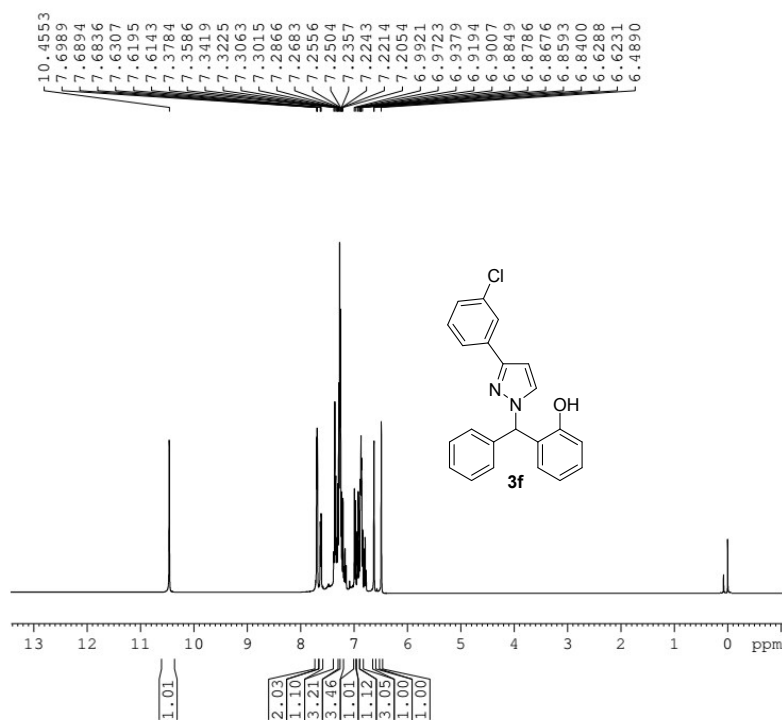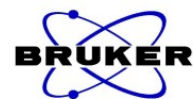

```

NAME          4c-3c1
EXPNO         1
PROCNO        1
Date_         20160329
Time          13.49
INSTRUM       spect
PROBHD        5 mm PABBO BB/
PULPROG       zg30
TD            65536
SOLVENT       CDCl3
NS            16
DS            2
SWH           8012.820 Hz
FIDRES        0.122266 Hz
AQ            4.0894966 sec
RG            32.77
DW           62.400 usec
DE            6.50 usec
TE            298.3 K
D1            1.0000000 sec
TD0           1

----- CHANNEL f1 -----
SFO1          400.1324710 MHz
NUC1          1H
P1            8.97 usec
SI            65536
SF            400.1300198 MHz
WDW           EM
SSB           0
LB            0.30 Hz
GB            0
PC            1.00
  
```

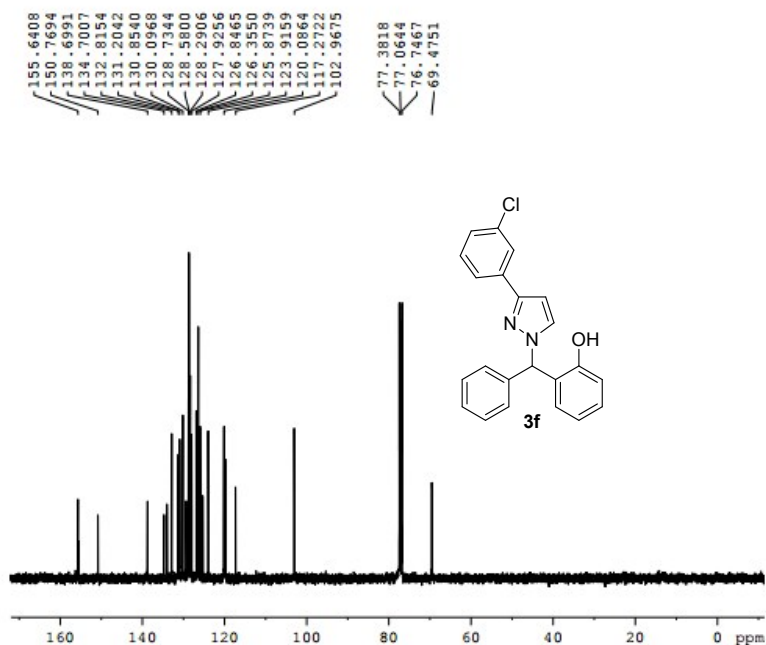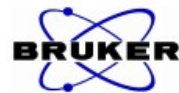

```

NAME          4c-3c1
EXPNO         2
PROCNO        1
Date_         20160329
Time          14.04
INSTRUM       spect
PROBHD        5 mm PABBO BB/
PULPROG       zgpg30
TD            65536
SOLVENT       CDCl3
NS            242
DS            4
SWH           24038.461 Hz
FIDRES        0.366798 Hz
AQ            1.3631988 sec
RG            194.26
DW           20.800 usec
DE            6.50 usec
TE            298.3 K
D1            2.0000000 sec
D11           0.0300000 sec
TD0           1

----- CHANNEL f1 -----
SFO1          100.6228293 MHz
NUC1          13C
P1            8.59 usec
SI            32768
SF            100.6127685 MHz
WDW           EM
SSB           0
LB            1.00 Hz
GB            0
PC            1.40
  
```

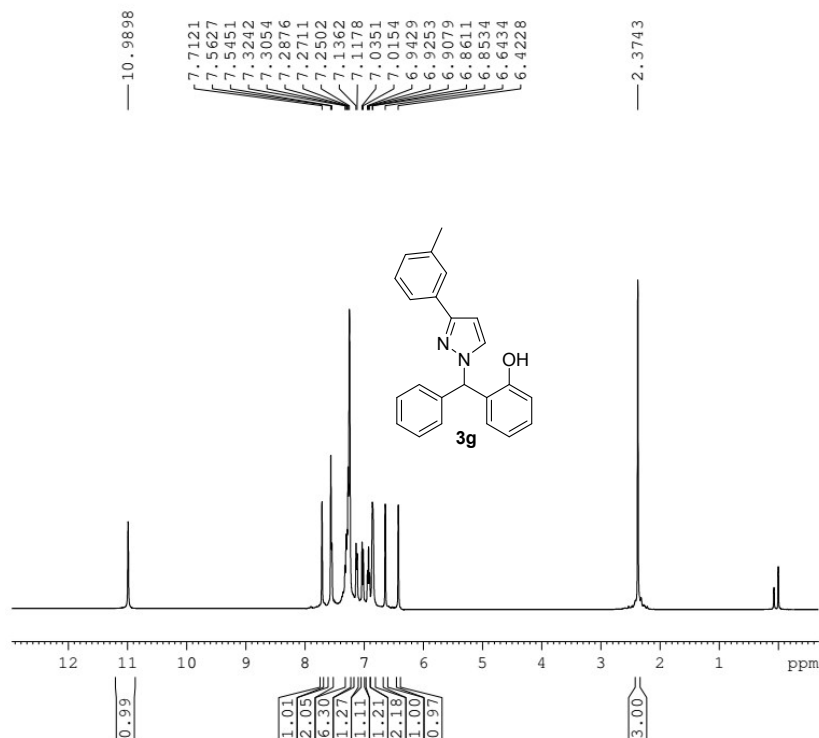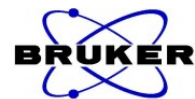

```

NAME          4d-3me
EXPNO         1
PROCNO        1
Date_         20160329
Time          22.34
INSTRUM       spect
PROBHD        5 mm PABBO BB/
PULPROG       zg30
TD            65536
SOLVENT       CDCl3
NS            16
DS            2
SWH           8012.820 Hz
FIDRES        0.122266 Hz
AQ            4.0894966 sec
RG            63
DW            62.400 usec
DE            6.50 usec
TE            298.3 K
D1            1.00000000 sec
D11           1
D10           1

----- CHANNEL f1 -----
SFO1          400.1324710 MHz
NUC1          1H
P1            8.97 usec
SI            65536
SF            400.1300154 MHz
WDW           EM
SSB           0
LB            0.30 Hz
GB            0
PC            1.00

```

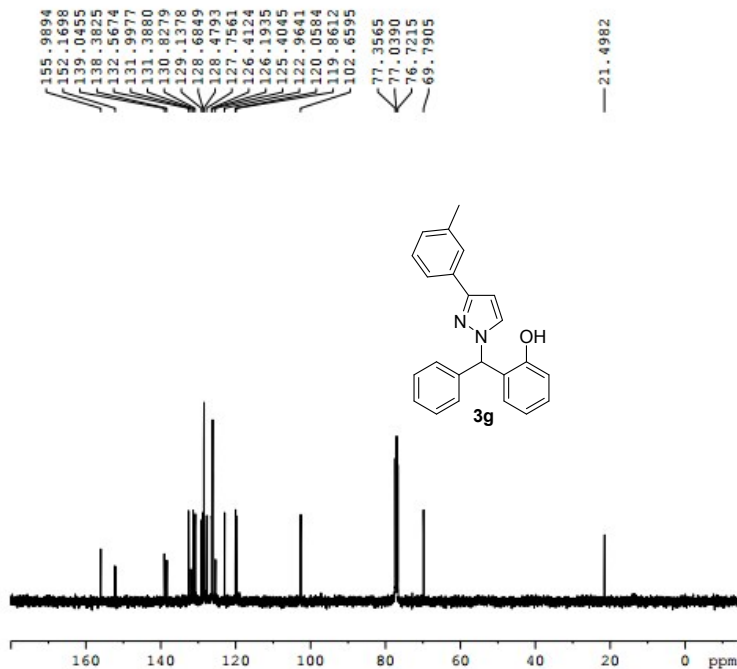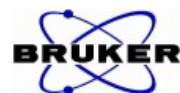

```

NAME          4d-3me
EXPNO         2
PROCNO        1
Date_         20160329
Time          23.04
INSTRUM       spect
PROBHD        5 mm PABBO BB/
PULPROG       zgpg30
TD            65536
SOLVENT       CDCl3
NS            312
DS            4
SWH           24038.461 Hz
FIDRES        0.366798 Hz
AQ            1.3631988 sec
RG            194.26
DW            20.800 usec
DE            6.50 usec
TE            298.3 K
D1            2.00000000 sec
D11           0.03000000 sec
D10           1

----- CHANNEL f1 -----
SFO1          100.6228293 MHz
NUC1          13C
P1            8.59 usec
SI            32768
SF            100.6127685 MHz
WDW           EM
SSB           0
LB            1.00 Hz
GB            0
PC            1.40

```

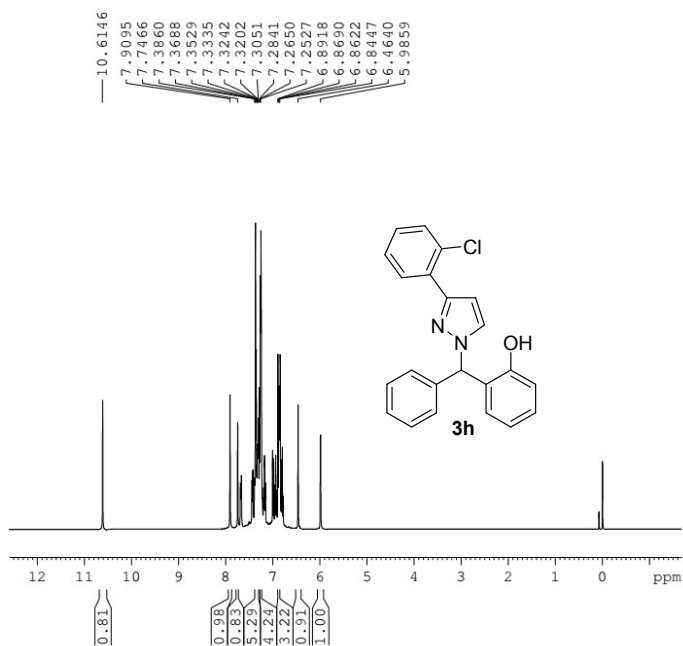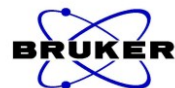

```

NAME          4a-2c1
EXPNO         1
PROCNO        1
Date_         20160329
Time          20.54
INSTRUM       spect
PROBHD        5 mm PABBO BB/
PULPROG       zgpg30
TD            65536
SOLVENT       CDCl3
NS            16
DS            2
SWH           8012.820 Hz
FIDRES       0.122266 Hz
AQ           4.0894966 sec
RG            57.79
DW           62.400 usec
DE            6.50 usec
TE            298.3 K
D1            1.00000000 sec
D11           1
D12           1
D13           1
D14           1
D15           1
D16           1
D17           1
D18           1
D19           1
D20           1
D21           1
D22           1
D23           1
D24           1
D25           1
D26           1
D27           1
D28           1
D29           1
D30           1
D31           1
D32           1
D33           1
D34           1
D35           1
D36           1
D37           1
D38           1
D39           1
D40           1
D41           1
D42           1
D43           1
D44           1
D45           1
D46           1
D47           1
D48           1
D49           1
D50           1
D51           1
D52           1
D53           1
D54           1
D55           1
D56           1
D57           1
D58           1
D59           1
D60           1
D61           1
D62           1
D63           1
D64           1
D65           1
D66           1
D67           1
D68           1
D69           1
D70           1
D71           1
D72           1
D73           1
D74           1
D75           1
D76           1
D77           1
D78           1
D79           1
D80           1
D81           1
D82           1
D83           1
D84           1
D85           1
D86           1
D87           1
D88           1
D89           1
D90           1
D91           1
D92           1
D93           1
D94           1
D95           1
D96           1
D97           1
D98           1
D99           1
D100          1
D101          1
D102          1
D103          1
D104          1
D105          1
D106          1
D107          1
D108          1
D109          1
D110          1
D111          1
D112          1
D113          1
D114          1
D115          1
D116          1
D117          1
D118          1
D119          1
D120          1
D121          1
D122          1
D123          1
D124          1
D125          1
D126          1
D127          1
D128          1
D129          1
D130          1
D131          1
D132          1
D133          1
D134          1
D135          1
D136          1
D137          1
D138          1
D139          1
D140          1
D141          1
D142          1
D143          1
D144          1
D145          1
D146          1
D147          1
D148          1
D149          1
D150          1
D151          1
D152          1
D153          1
D154          1
D155          1
D156          1
D157          1
D158          1
D159          1
D160          1
D161          1
D162          1
D163          1
D164          1
D165          1
D166          1
D167          1
D168          1
D169          1
D170          1
D171          1
D172          1
D173          1
D174          1
D175          1
D176          1
D177          1
D178          1
D179          1
D180          1
D181          1
D182          1
D183          1
D184          1
D185          1
D186          1
D187          1
D188          1
D189          1
D190          1
D191          1
D192          1
D193          1
D194          1
D195          1
D196          1
D197          1
D198          1
D199          1
D200          1
D201          1
D202          1
D203          1
D204          1
D205          1
D206          1
D207          1
D208          1
D209          1
D210          1
D211          1
D212          1
D213          1
D214          1
D215          1
D216          1
D217          1
D218          1
D219          1
D220          1
D221          1
D222          1
D223          1
D224          1
D225          1
D226          1
D227          1
D228          1
D229          1
D230          1
D231          1
D232          1
D233          1
D234          1
D235          1
D236          1
D237          1
D238          1
D239          1
D240          1
D241          1
D242          1
D243          1
D244          1
D245          1
D246          1
D247          1
D248          1
D249          1
D250          1
D251          1
D252          1
D253          1
D254          1
D255          1
D256          1
D257          1
D258          1
D259          1
D260          1
D261          1
D262          1
D263          1
D264          1
D265          1
D266          1
D267          1
D268          1
D269          1
D270          1
D271          1
D272          1
D273          1
D274          1
D275          1
D276          1
D277          1
D278          1
D279          1
D280          1
D281          1
D282          1
D283          1
D284          1
D285          1
D286          1
D287          1
D288          1
D289          1
D290          1
D291          1
D292          1
D293          1
D294          1
D295          1
D296          1
D297          1
D298          1
D299          1
D300          1
D301          1
D302          1
D303          1
D304          1
D305          1
D306          1
D307          1
D308          1
D309          1
D310          1
D311          1
D312          1
D313          1
D314          1
D315          1
D316          1
D317          1
D318          1
D319          1
D320          1
D321          1
D322          1
D323          1
D324          1
D325          1
D326          1
D327          1
D328          1
D329          1
D330          1
D331          1
D332          1
D333          1
D334          1
D335          1
D336          1
D337          1
D338          1
D339          1
D340          1
D341          1
D342          1
D343          1
D344          1
D345          1
D346          1
D347          1
D348          1
D349          1
D350          1
D351          1
D352          1
D353          1
D354          1
D355          1
D356          1
D357          1
D358          1
D359          1
D360          1
D361          1
D362          1
D363          1
D364          1
D365          1
D366          1
D367          1
D368          1
D369          1
D370          1
D371          1
D372          1
D373          1
D374          1
D375          1
D376          1
D377          1
D378          1
D379          1
D380          1
D381          1
D382          1
D383          1
D384          1
D385          1
D386          1
D387          1
D388          1
D389          1
D390          1
D391          1
D392          1
D393          1
D394          1
D395          1
D396          1
D397          1
D398          1
D399          1
D400          1
D401          1
D402          1
D403          1
D404          1
D405          1
D406          1
D407          1
D408          1
D409          1
D410          1
D411          1
D412          1
D413          1
D414          1
D415          1
D416          1
D417          1
D418          1
D419          1
D420          1
D421          1
D422          1
D423          1
D424          1
D425          1
D426          1
D427          1
D428          1
D429          1
D430          1
D431          1
D432          1
D433          1
D434          1
D435          1
D436          1
D437          1
D438          1
D439          1
D440          1
D441          1
D442          1
D443          1
D444          1
D445          1
D446          1
D447          1
D448          1
D449          1
D450          1
D451          1
D452          1
D453          1
D454          1
D455          1
D456          1
D457          1
D458          1
D459          1
D460          1
D461          1
D462          1
D463          1
D464          1
D465          1
D466          1
D467          1
D468          1
D469          1
D470          1
D471          1
D472          1
D473          1
D474          1
D475          1
D476          1
D477          1
D478          1
D479          1
D480          1
D481          1
D482          1
D483          1
D484          1
D485          1
D486          1
D487          1
D488          1
D489          1
D490          1
D491          1
D492          1
D493          1
D494          1
D495          1
D496          1
D497          1
D498          1
D499          1
D500          1
D501          1
D502          1
D503          1
D504          1
D505          1
D506          1
D507          1
D508          1
D509          1
D510          1
D511          1
D512          1
D513          1
D514          1
D515          1
D516          1
D517          1
D518          1
D519          1
D520          1
D521          1
D522          1
D523          1
D524          1
D525          1
D526          1
D527          1
D528          1
D529          1
D530          1
D531          1
D532          1
D533          1
D534          1
D535          1
D536          1
D537          1
D538          1
D539          1
D540          1
D541          1
D542          1
D543          1
D544          1
D545          1
D546          1
D547          1
D548          1
D549          1
D550          1
D551          1
D552          1
D553          1
D554          1
D555          1
D556          1
D557          1
D558          1
D559          1
D560          1
D561          1
D562          1
D563          1
D564          1
D565          1
D566          1
D567          1
D568          1
D569          1
D570          1
D571          1
D572          1
D573          1
D574          1
D575          1
D576          1
D577          1
D578          1
D579          1
D580          1
D581          1
D582          1
D583          1
D584          1
D585          1
D586          1
D587          1
D588          1
D589          1
D590          1
D591          1
D592          1
D593          1
D594          1
D595          1
D596          1
D597          1
D598          1
D599          1
D600          1
D601          1
D602          1
D603          1
D604          1
D605          1
D606          1
D607          1
D608          1
D609          1
D610          1
D611          1
D612          1
D613          1
D614          1
D615          1
D616          1
D617          1
D618          1
D619          1
D620          1
D621          1
D622          1
D623          1
D624          1
D625          1
D626          1
D627          1
D628          1
D629          1
D630          1
D631          1
D632          1
D633          1
D634          1
D635          1
D636          1
D637          1
D638          1
D639          1
D640          1
D641          1
D642          1
D643          1
D644          1
D645          1
D646          1
D647          1
D648          1
D649          1
D650          1
D651          1
D652          1
D653          1
D654          1
D655          1
D656          1
D657          1
D658          1
D659          1
D660          1
D661          1
D662          1
D663          1
D664          1
D665          1
D666          1
D667          1
D668          1
D669          1
D670          1
D671          1
D672          1
D673          1
D674          1
D675          1
D676          1
D677          1
D678          1
D679          1
D680          1
D681          1
D682          1
D683          1
D684          1
D685          1
D686          1
D687          1
D688          1
D689          1
D690          1
D691          1
D692          1
D693          1
D694          1
D695          1
D696          1
D697          1
D698          1
D699          1
D700          1
D701          1
D702          1
D703          1
D704          1
D705          1
D706          1
D707          1
D708          1
D709          1
D710          1
D711          1
D712          1
D713          1
D714          1
D715          1
D716          1
D717          1
D718          1
D719          1
D720          1
D721          1
D722          1
D723          1
D724          1
D725          1
D726          1
D727          1
D728          1
D729          1
D730          1
D731          1
D732          1
D733          1
D734          1
D735          1
D736          1
D737          1
D738          1
D739          1
D740          1
D741          1
D742          1
D743          1
D744          1
D745          1
D746          1
D747          1
D748          1
D749          1
D750          1
D751          1
D752          1
D753          1
D754          1
D755          1
D756          1
D757          1
D758          1
D759          1
D760          1
D761          1
D762          1
D763          1
D764          1
D765          1
D766          1
D767          1
D768          1
D769          1
D770          1
D771          1
D772          1
D773          1
D774          1
D775          1
D776          1
D777          1
D778          1
D779          1
D780          1
D781          1
D782          1
D783          1
D784          1
D785          1
D786          1
D787          1
D788          1
D789          1
D790          1
D791          1
D792          1
D793          1
D794          1
D795          1
D796          1
D797          1
D798          1
D799          1
D800          1
D801          1
D802          1
D803          1
D804          1
D805          1
D806          1
D807          1
D808          1
D809          1
D810          1
D811          1
D812          1
D813          1
D814          1
D815          1
D816          1
D817          1
D818          1
D819          1
D820          1
D821          1
D822          1
D823          1
D824          1
D825          1
D826          1
D827          1
D828          1
D829          1
D830          1
D831          1
D832          1
D833          1
D834          1
D835          1
D836          1
D837          1
D838          1
D839          1
D840          1
D841          1
D842          1
D843          1
D844          1
D845          1
D846          1
D847          1
D848          1
D849          1
D850          1
D851          1
D852          1
D853          1
D854          1
D855          1
D856          1
D857          1
D858          1
D859          1
D860          1
D861          1
D862          1
D863          1
D864          1
D865          1
D866          1
D867          1
D868          1
D869          1
D870          1
D871          1
D872          1
D873          1
D874          1
D875          1
D876          1
D877          1
D878          1
D879          1
D880          1
D881          1
D882          1
D883          1
D884          1
D885          1
D886          1
D887          1
D888          1
D889          1
D890          1
D891          1
D892          1
D893          1
D894          1
D895          1
D896          1
D897          1
D898          1
D899          1
D900          1
D901          1
D902          1
D903          1
D904          1
D905          1
D906          1
D907          1
D908          1
D909          1
D910          1
D911          1
D912          1
D913          1
D914          1
D915          1
D916          1
D917          1
D918          1
D919          1
D920          1
D921          1
D922          1
D923          1
D924          1
D925          1
D926          1
D927          1
D928          1
D929          1
D930          1
D931          1
D932          1
D933          1
D934          1
D935          1
D936          1
D937          1
D938          1
D939          1
D940          1
D941          1
D942          1
D943          1
D944          1
D945          1
D946          1
D947          1
D948          1
D949          1
D950          1
D951          1
D952          1
D953          1
D954          1
D955          1
D956          1
D957          1
D958          1
D959          1
D960          1
D961          1
D962          1
D963          1
D964          1
D965          1
D966          1
D967          1
D968          1
D969          1
D970          1
D971          1
D972          1
D973          1
D974          1
D975          1
D976          1
D977          1
D978          1
D979          1
D980          1
D981          1
D982          1
D983          1
D984          1
D985          1
D986          1
D987          1
D988          1
D989          1
D990          1
D991          1
D992          1
D993          1
D994          1
D995          1
D996          1
D997          1
D998          1
D999          1

```

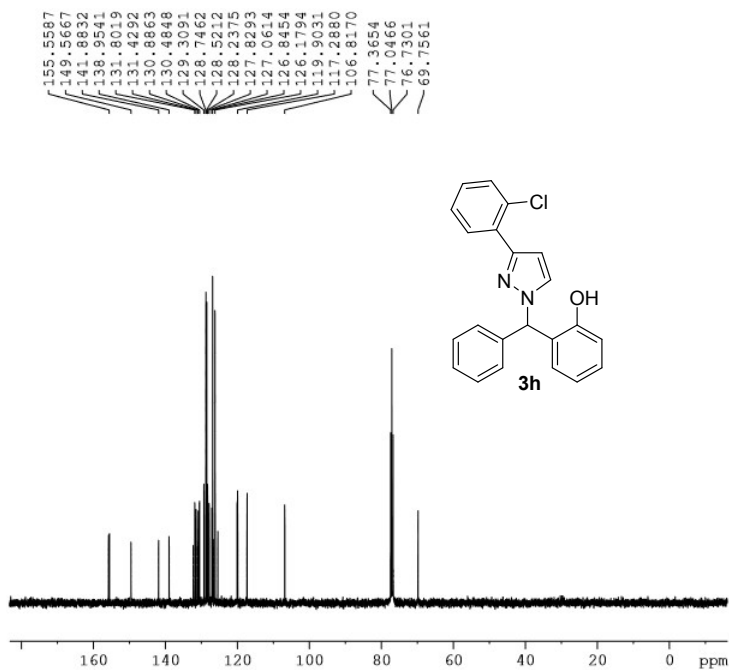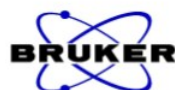

```

NAME          4a-2c1
EXPNO         2
PROCNO        1
Date_         20160329
Time          20.56
INSTRUM       spect
PROBHD        5 mm PABBO BB/
PULPROG       zgpg30
TD            65536
SOLVENT       CDCl3
NS            256
DS            2
SWH           24038.461 Hz
FIDRES       0.366798 Hz
AQ           1.3631988 sec
RG            194.26
DW           20.800 usec
DE            6.50 usec
TE            298.5 K
D1            2.00000000 sec
D11           0.03000000 sec
D12           1
D13           1
D14           1
D15           1
D16           1
D17           1
D18           1
D19           1
D20           1
D21           1
D22           1
D23           1
D24           1
D25           1
D26           1
D27           1
D28           1
D29           1
D30           1
D31           1
D32           1
D33           1
D34           1
D35           1
D36           1
D37           1
D38           1
D39           1
D40           1
D41           1
D42           1
D43           1
D44           1
D45           1
D46           1
D47           1
D48           1
D49           1
D50           1
D51           1
D52           1
D53           1
D54           1
D55           1
D56           1
D57           1
D58           1
D59           1
D60           1
D61           1
D62           1
D63           1
D64           1
D65           1
D66           1
D67           1
D68           1
D69           1
D70           1
D71           1
D72           1
D73           1
D74           1
D75           1
D76           1
D77           1
D78           1
D79           1
D80           1
D81           1
D82           1
D83           1
D84           1
D85           1
D86           1
D87           1
D88           1
D89           1
D90           1
D91           1
D92           1
D93           1
D94           1
D95           1
D96           1
D97           1
D98           1
D99           1
D100          1
D101          1
D102          1
D103          1
D104          1
D105          1
D106          1
D107          1
D108          1
D109          1
D110          1
D111          1
D112          1
D113          1
D114          1
D115          1
D116          1
D117          1
D118          1
D119          1
D120          1
D121          1
D122          1
D123          1
D124          1
D125          1
D126          1
D127          1
D128          1
D129          1
D130          1
D131          1
D132          1
D133          1
D134          1
D135          1
D136          1
D137          1
D138          1
D139          1
D140          1
D141          1
D142          1
D143          1
D144          1
D145          1
D146          1
D147          1
D148          1
D149          1
D150          1
D151          1
D152          1
D153          1
D154          1
D155          1
D156          1
D157          1
D158          1
D159          1
D160          1
D161          1
D162          1
D163          1
D164          1
D165          1
D166          1
D167          1
D168          1
D169          1
D170          1
D171          1
D172          1
D173          1
D174          1
D175          1
D176          1
D177          1
D178          1
D179          1
D180          1
D181          1
D182          1
D183          1
D184          1
D185          1
D186          1
D187          1
D188          1
D189          1
D190          1
D191          1
D192          1
D193          1
D194          1
D195          1
D196          1
D197          1
D198          1
D199          1
D200          1
D201          1
D202          1
D203          1
D204          1
D205          1
D206          1
D207          1
D208          1
D209          1
D210          1
D211          1
D212          1
D213          1
D214          1
D215          1
D216          1
D217          1
D218          1
D219          1
D220          1
D221          1
D222          1
D223          1
D224          1
D225          1
D226          1
D227          1
D228          1
D229          1
D230          1
D231          1
D232          1
D233          1
D234          1
D235          1
D236          1
D237          1
D238          1
D239          1
D240          1
D241          1
D242          1
D243          1
D244          1
D245          1
D246          1
D247          1
D248          1
D249          1
D250          1
D251          1
D252          1
D253          1
D254          1
D255          1
D256          1
D257          1
D258          1
D259          1
D260          1
D261          1
D262          1
D263          1
D264          1
D265          1
D266          1
D267          1
D268          1
D269          1
D270          1
D271          1
D272          1
D273          1
D274          1
D275          1
D276          1
D277          1
D278          1
D279          1
D280          1
D281          1
D282          1
D283          1
D284          1
D285          1
D286          1
D287          1
D288          1
D289          1
D290          1
D291          1
D292          1
D293          1
D294          1
D295          1
D296          1
D297          1
D298          1
D299          1
D300          1
D301          1
D302          1
D303          1
D304          1
D305          1
D306          1
D307          1
D308          1
D309          1
D310          1
D311          1
D312          1
D313          1
D314          1
D315          1
D316          1
D317          1
D318          1
D319          1
D320          1
D321          1
D322          1
D323          1
D324          1
D325          1
D326          1
D327          1
D328          1
D329          1
D330          1
D331          1
D332          1
D333          1
D334          1
D335          1
D336          1
D337          1
D338          1
D339          1
D340          1
D341          1
D342          1
D343          1
D344          1
D345          1
D346          1
D347          1
D348          1
D349          1
D350          1
D351          1
D352          1
D353          1
D354          1
D355          1
D356          1
D357          1
D358          1
D359          1
D360          1
D361          1
D362          1
D363          1
D364          1
D365          1
D366          1
D367          1
D368          1
D369          1
D370          1
D371          1
D372          1
D373          1
D374          1
D375          1
D376          1
D377          1
D378          1
D379          1
D380          1
D381          1
D382          1
D383          1
D384          1
D385          1
D386          1
D387          1
D388          1
D389          1
D390          1
D391          1
D392          1
D393          1
D394          1
D395          1
D396          1
D397          1
D398          1
D399          1
D400          1
D401          1
D402          1
D403          1
D404          1
D405          1
D406          1
D407          1
D408          1
D409          1
D410          1
D411          1
D412          1
D413          1
D414          1
D415          1
D416          1

```

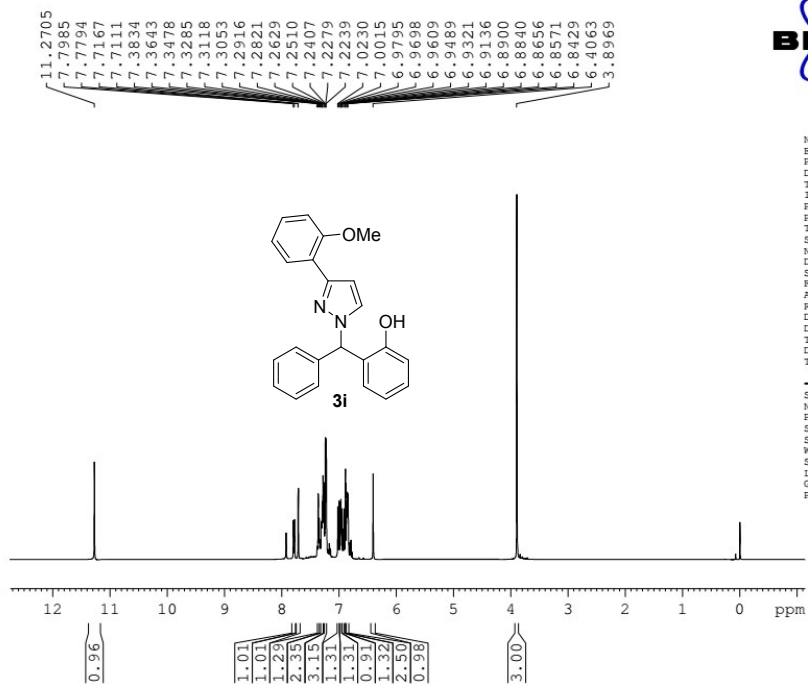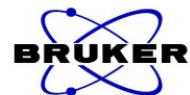

```

NAME          4b-2ome
EXPNO         1
PROCNO        1
Date_         20160329
Time          21.35
INSTRUM       spect
PROBHD        5 mm PABBO BB/
PULPROG       zg30
TD            65536
SOLVENT       CDCl3
NS            16
DS            2
SWH           8012.820 Hz
FIDRES        0.122266 Hz
AQ            4.0894966 sec
RG            51.19
DW            62.400 usec
DE            6.50 usec
TE            298.3 K
D1            1.00000000 sec
TD0           1

----- CHANNEL f1 -----
SFO1          400.1324710 MHz
NUC1          1H
P1            8.97 usec
SI            65536
SF            400.1300175 MHz
WDW           EM
SSB           0
LB            0.30 Hz
GB            0
PC            1.00
  
```

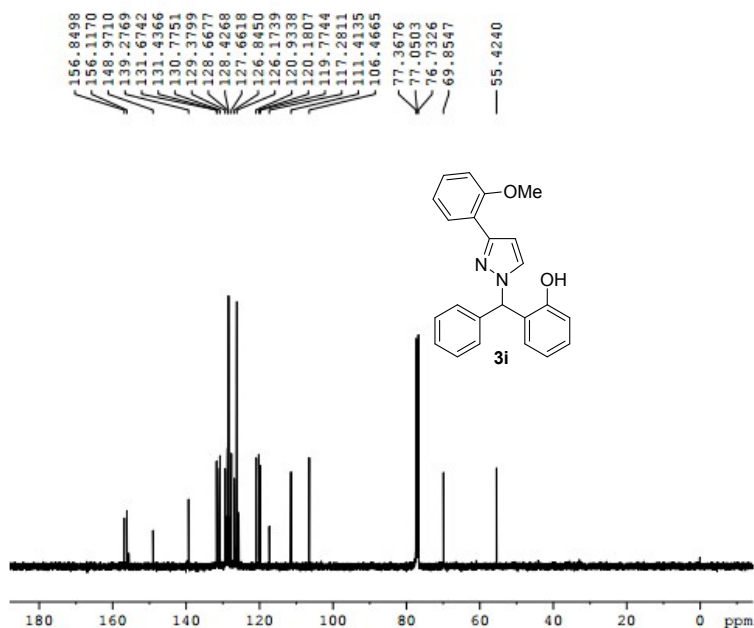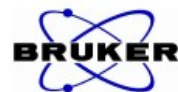

```

NAME          4b-2ome
EXPNO         2
PROCNO        1
Date_         20160329
Time          22.06
INSTRUM       spect
PROBHD        5 mm PABBO BB/
PULPROG       zgpg30
TD            65536
SOLVENT       CDCl3
NS            512
DS            4
SWH           24038.461 Hz
FIDRES        0.366798 Hz
AQ            1.3631988 sec
RG            194.26
DW            20.800 usec
DE            6.50 usec
TE            298.3 K
D1            2.00000000 sec
D11           0.03000000 sec
TD0           1

----- CHANNEL f1 -----
SFO1          100.6228293 MHz
NUC1          13C
P1            8.59 usec
SI            32768
SF            100.6127685 MHz
WDW           EM
SSB           0
LB            1.00 Hz
GB            0
PC            1.40
  
```

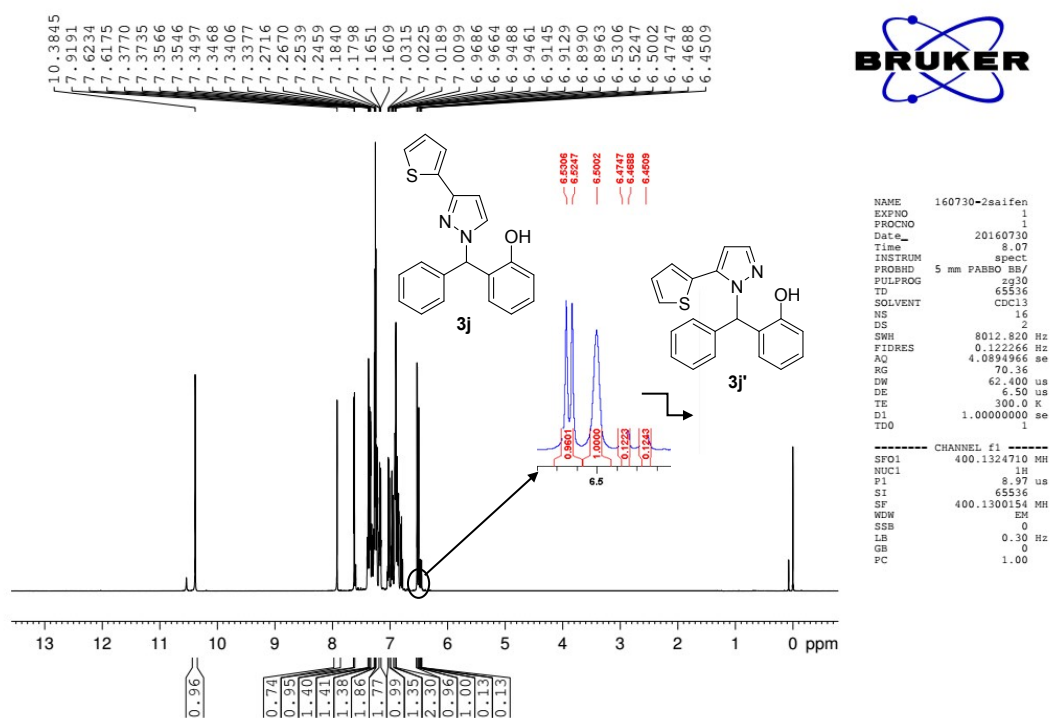

the ratio of 3j:3j' was about 8:1

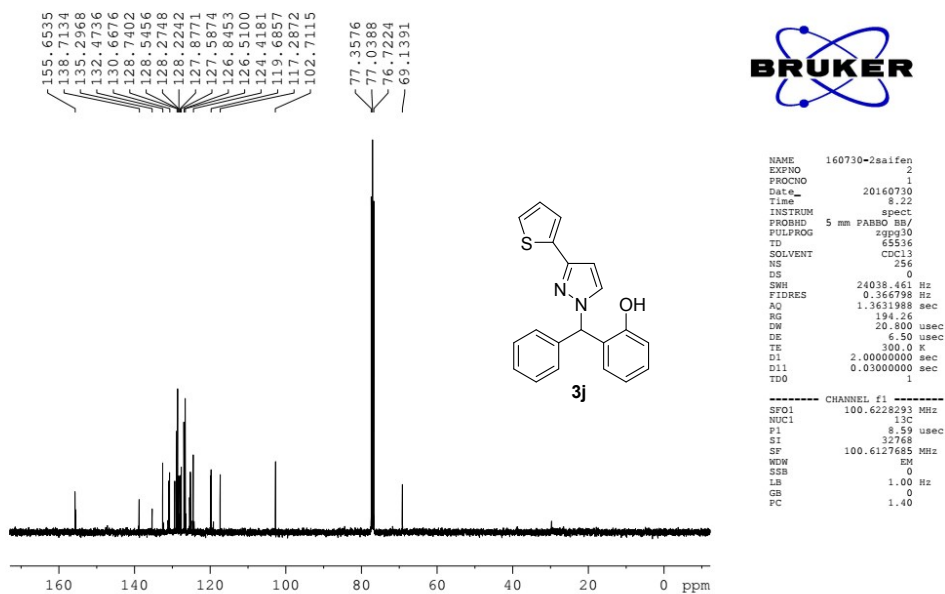

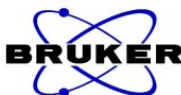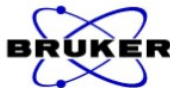

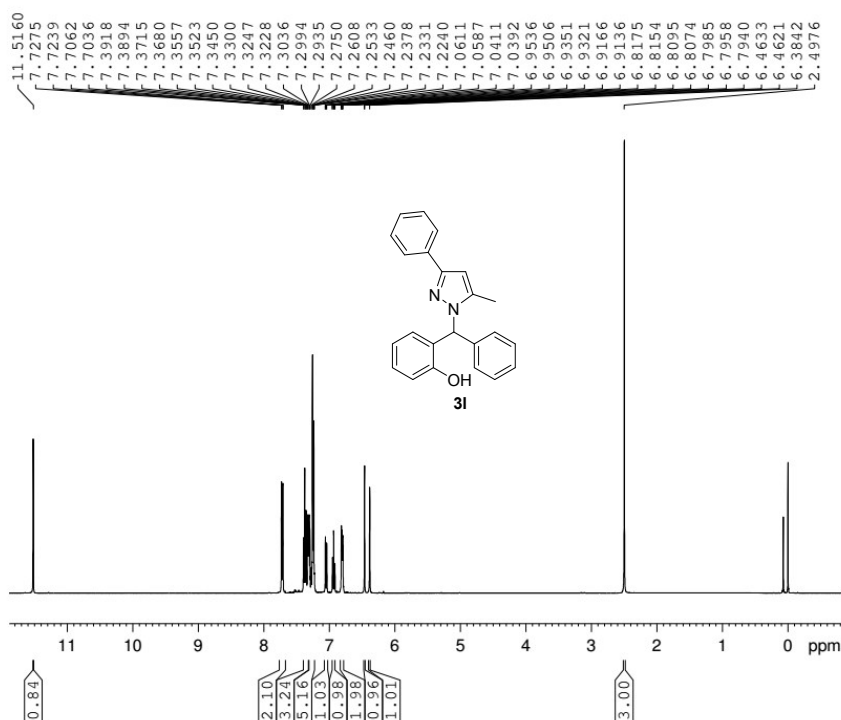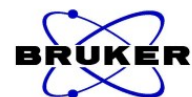

NAME 160730-Metong  
EXPNO 1  
PROCNO 1  
Date\_ 20160730  
Time 9.07  
INSTRUM spect  
PROBHD 5 mm PABBO BB/  
PULPROG zgpg30  
TD 65536  
SOLVENT CDCl3  
NS 16  
DS 2  
SWH 8012.820 Hz  
FIDRES 0.122266 Hz  
AQ 4.0894966 sec  
RG 77.71  
DW 62.400 usec  
DE 6.50 usec  
TE 300.0 K  
D1 1.00000000 sec  
TD0 1

----- CHANNEL f1 -----  
SF01 400.1324710 MHz  
NUC1 1H  
P1 8.97 usec  
SI 65536  
SF 400.1300124 MHz  
WDW EM  
SSB 0  
LB 0.30 Hz  
GB 0  
PC 1.00

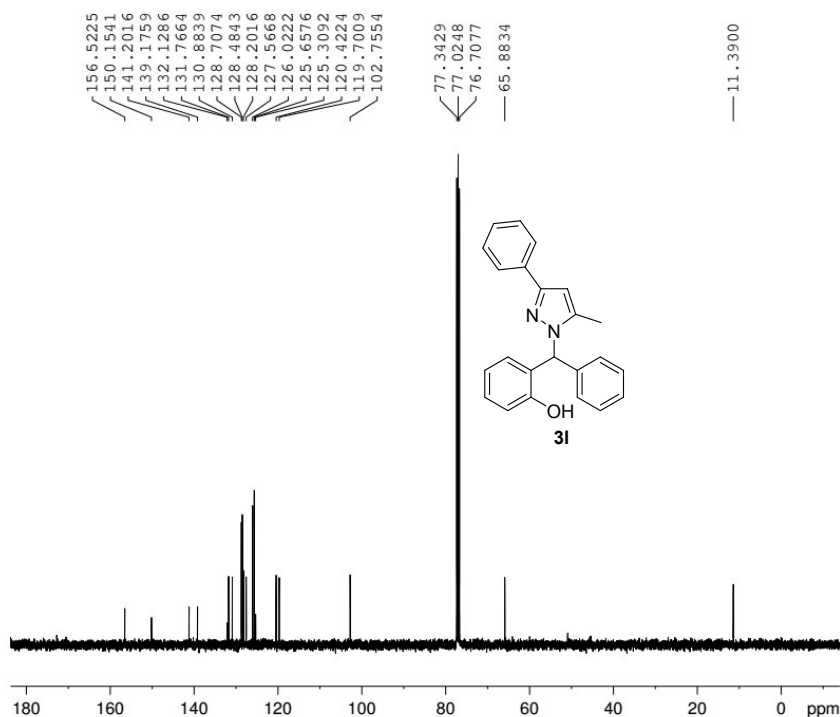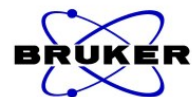

NAME 160730-Metong  
EXPNO 2  
PROCNO 1  
Date\_ 20160730  
Time 9.23  
INSTRUM spect  
PROBHD 5 mm PABBO BB/  
PULPROG zgpg30  
TD 65536  
SOLVENT CDCl3  
NS 256  
DS 0  
SWH 24038.461 Hz  
FIDRES 0.366798 Hz  
AQ 1.3631988 sec  
RG 194.26  
DW 20.800 usec  
DE 6.50 usec  
TE 300.0 K  
D1 2.00000000 sec  
D11 0.03000000 sec  
TD0 1

----- CHANNEL f1 -----  
SF01 100.6228293 MHz  
NUC1 13C  
P1 8.59 usec  
SI 32768  
SF 100.6127685 MHz  
WDW EM  
SSB 0  
LB 1.00 Hz  
GB 0  
PC 1.40

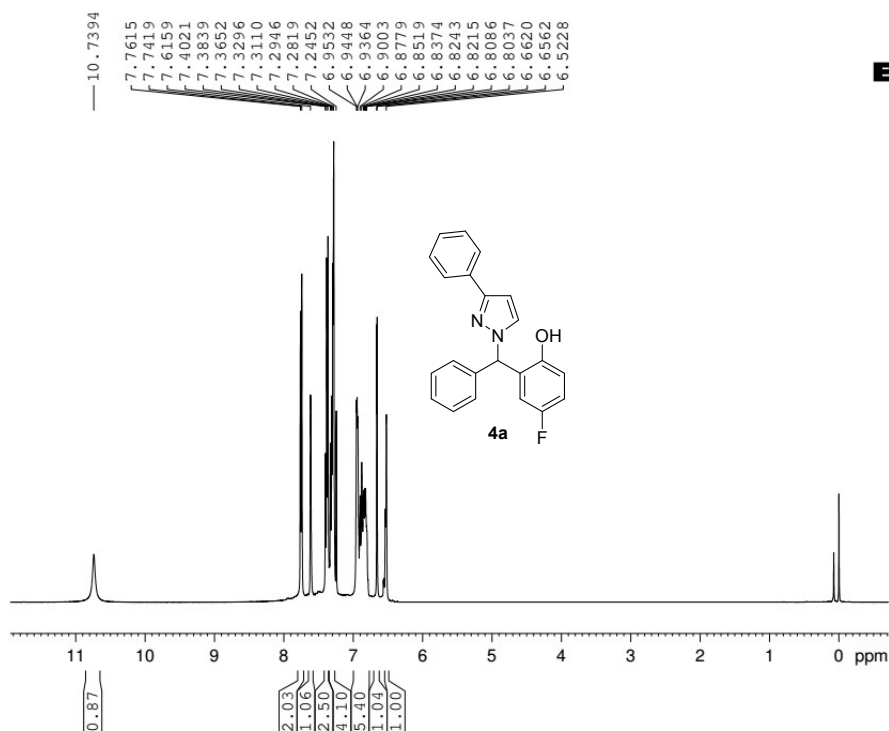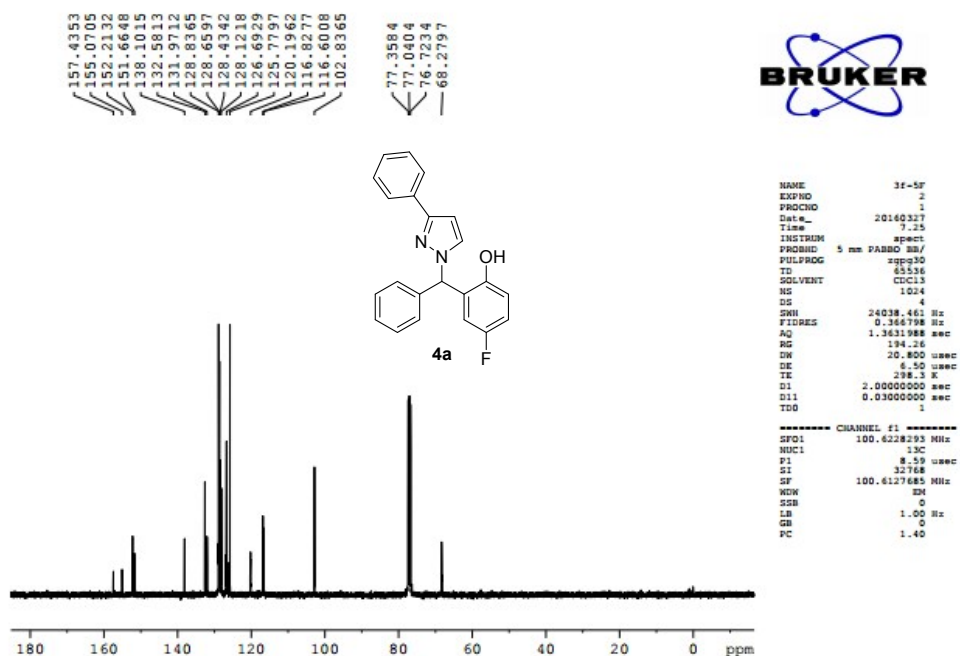

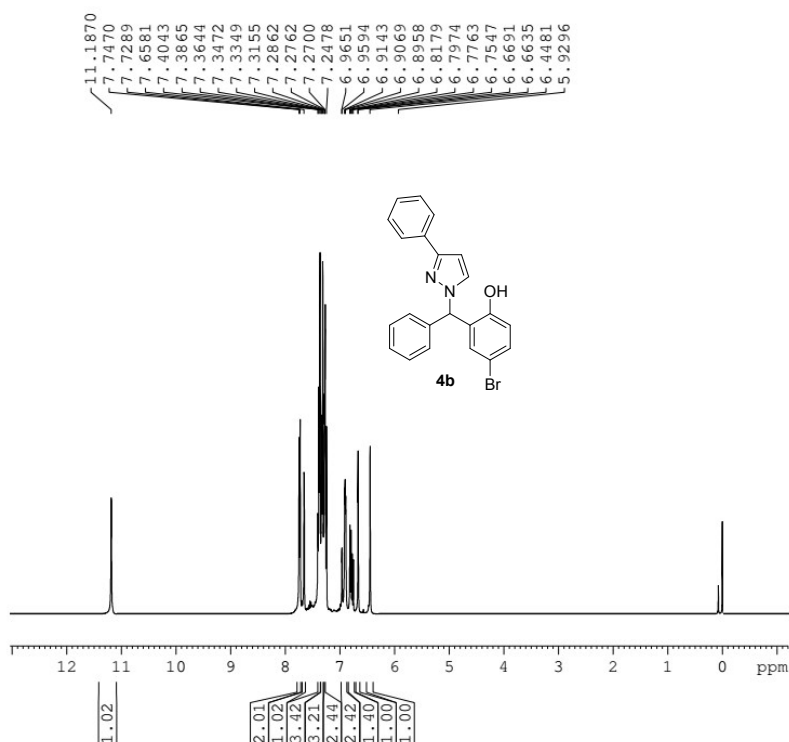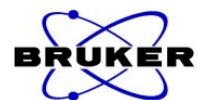

```

NAME      3g-5br
EXPNO     1
PROCNO    1
Date_     20160327
Time      7.29
INSTRUM   spect
PROBHD    5 mm PABBO BB/
PULPROG   zg30
TD         65536
SOLVENT   CDCl3
NS         16
DS         2
SWH        8012.820 Hz
FIDRES     0.122266 Hz
AQ         4.0894966 sec
RG         57.79
DM         62.400 usec
DE         6.50 usec
TE         298.3 K
D1         1.00000000 sec
D11        1
TD0        1

----- CHANNEL f1 -----
SFO1      400.1324710 MHz
NUC1       1H
P1         8.97 usec
SI         65536
SF         400.1300147 MHz
WDW        EM
SSB         0
LB         0.30 Hz
GB         0
PC         1.00
  
```

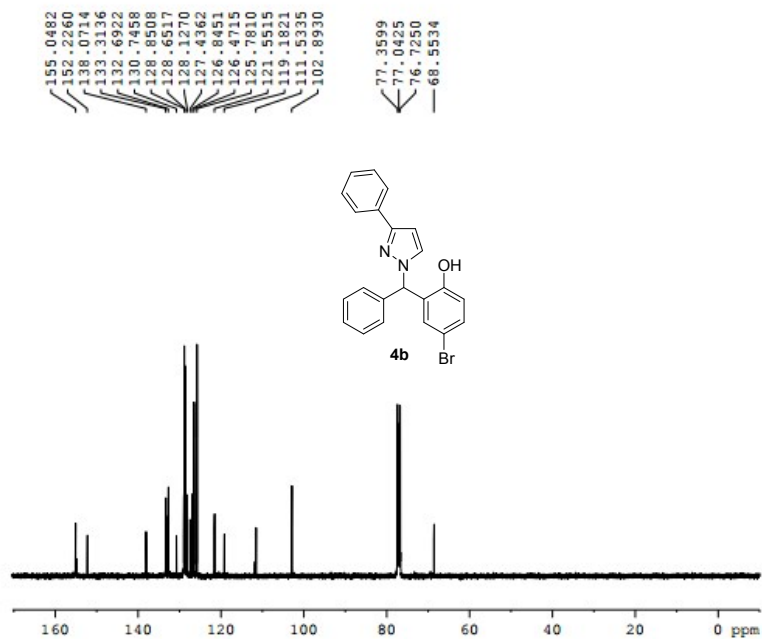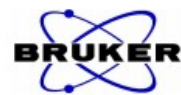

```

NAME      3g-5br
EXPNO     2
PROCNO    1
Date_     20160327
Time      8.29
INSTRUM   spect
PROBHD    5 mm PABBO BB/
PULPROG   zgpg30
TD         65536
SOLVENT   CDCl3
NS         1024
DS         4
SWH        24038.461 Hz
FIDRES     0.364798 Hz
AQ         1.3631988 sec
RG         194.26
DM         20.800 usec
DE         6.50 usec
TE         298.3 K
D1         2.00000000 sec
D11        0.03000000 sec
TD0        1

----- CHANNEL f1 -----
SFO1      100.6228293 MHz
NUC1       13C
P1         8.59 usec
SI         32768
SF         100.6127685 MHz
WDW        EM
SSB         0
LB         1.00 Hz
GB         0
PC         1.40
  
```

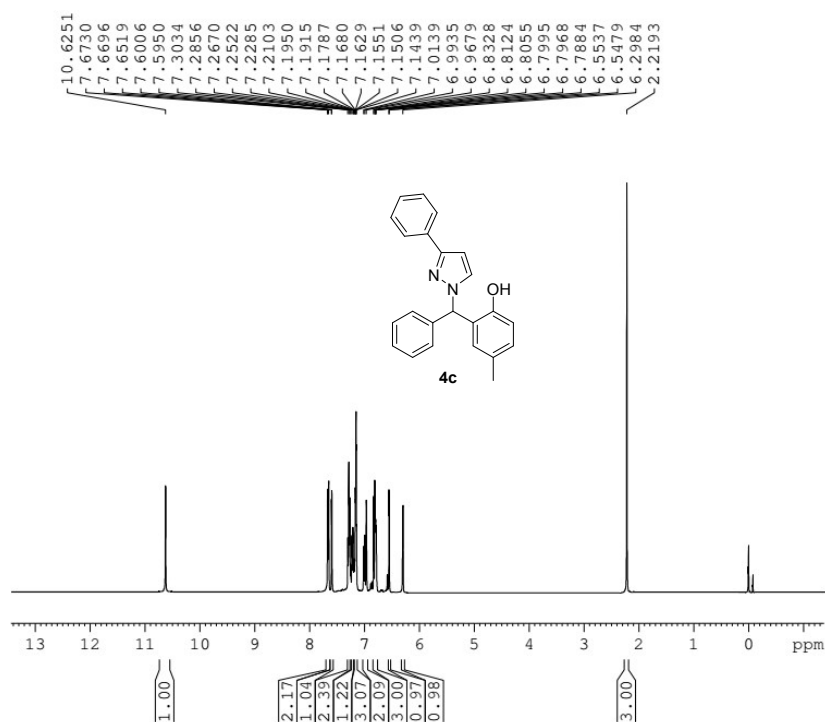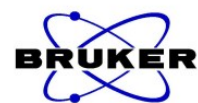

NAME 3h-5me  
EXPNO 1  
PROCNO 1  
Date\_ 20160327  
Time 9.38  
INSTRUM spect  
PROBHD 5 mm PABBO BB/  
PULPROG zg30  
TD 65536  
SOLVENT CDCl3  
NS 16  
DS 2  
SWH 8012.820 Hz  
FIDRES 0.122266 Hz  
AQ 4.0894966 sec  
RG 32.77  
DW 62.400 usec  
DE 6.50 usec  
TE 298.3 K  
D1 1.00000000 sec  
TD0 1

----- CHANNEL f1 -----  
SFO1 400.1324710 MHz  
NUC1 1H  
P1 8.97 usec  
SI 65536  
SF 400.1300563 MHz  
WDW EM  
SSB 0  
LB 0.30 Hz  
GB 0  
PC 1.00

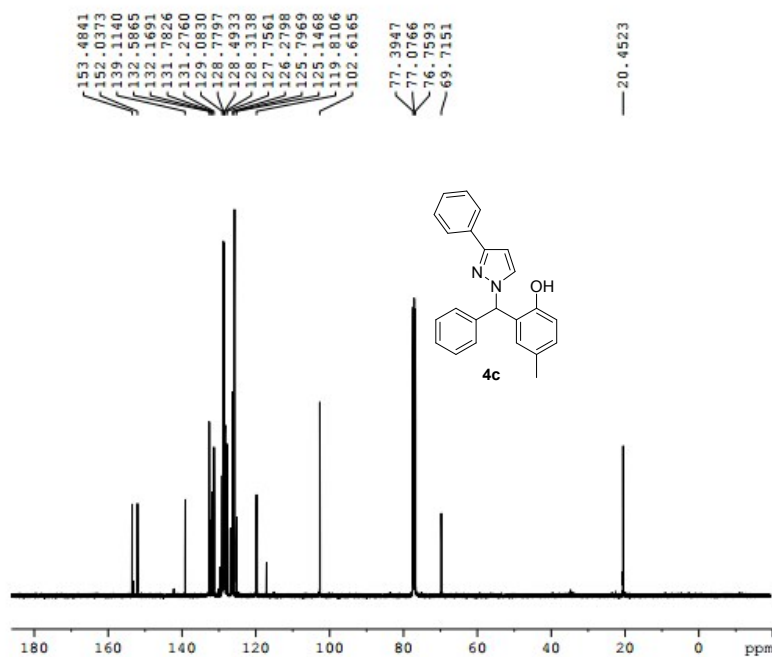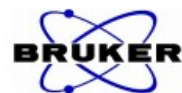

NAME 3h-5me  
EXPNO 2  
PROCNO 1  
Date\_ 20160327  
Time 10.38  
INSTRUM spect  
PROBHD 5 mm PABBO BB/  
PULPROG zgpg30  
TD 65536  
SOLVENT CDCl3  
NS 1024  
DS 4  
SWH 24038.461 Hz  
FIDRES 0.366798 Hz  
AQ 1.3631988 sec  
RG 194.26  
DM 20.800 usec  
DE 6.50 usec  
TE 298.3 K  
D1 2.00000000 sec  
D11 0.03000000 sec  
TD0 1

----- CHANNEL f1 -----  
SFO1 100.6228293 MHz  
NUC1 13C  
P1 8.59 usec  
SI 32768  
SF 100.6127683 MHz  
WDW EM  
SSB 0  
LB 1.00 Hz  
GB 0  
PC 1.40

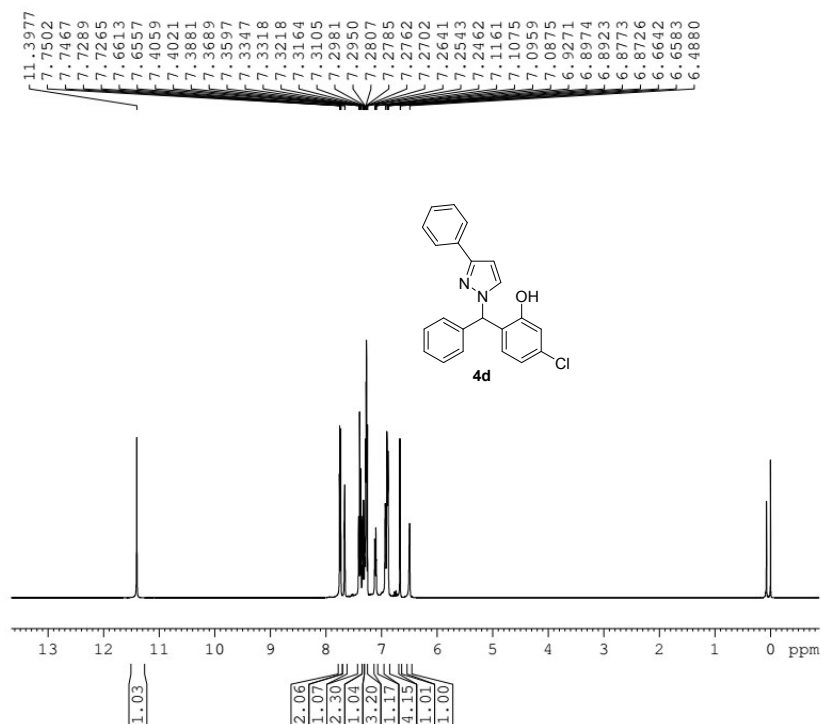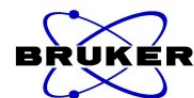

```

NAME          3c
EXPNO         1
PROCNO        1
Date_         20160327
Time          3.12
INSTRUM       spect
PROBHD        5 mm PABBO BB/
PULPROG       zg30
TD            65536
SOLVENT       CDCl3
NS            16
DS            2
SWH           8012.820 Hz
FIDRES        0.122266 Hz
AQ            4.0894966 sec
RG            32.77
DW            62.400 usec
DE            6.50 usec
TE            298.3 K
D1            1.00000000 sec
TD0           1
  
```

```

----- CHANNEL f1 -----
SFO1         400.1324710 MHz
NUC1          1H
P1            8.97 usec
SI            65536
SF            400.1300154 MHz
WDW           EM
SSB           0
LB            0.30 Hz
GB            0
PC            1.00
  
```

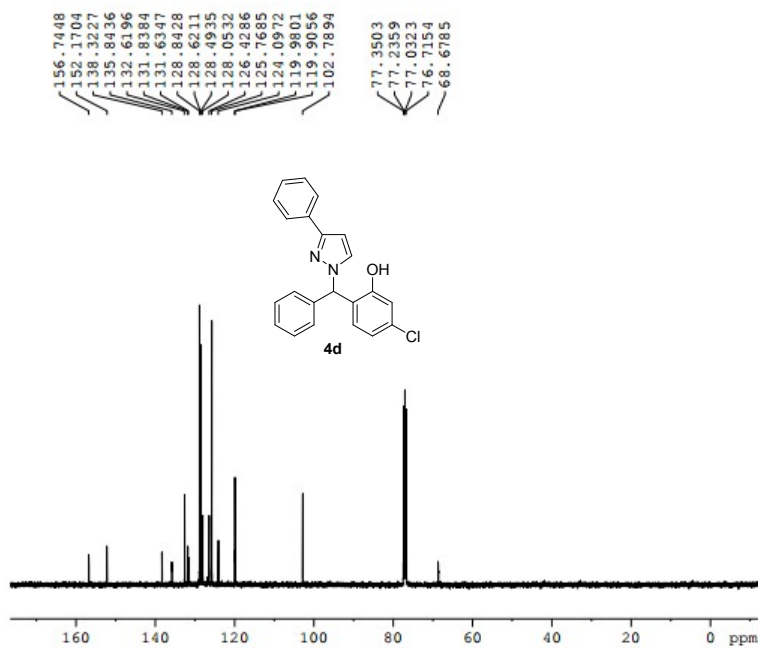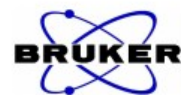

```

NAME          3c
EXPNO         2
PROCNO        1
Date_         20160327
Time          4.12
INSTRUM       spect
PROBHD        5 mm PABBO BB/
PULPROG       zgpg30
TD            65536
SOLVENT       CDCl3
NS            1024
DS            4
SWH           24038.461 Hz
FIDRES        0.366798 Hz
AQ            1.3631988 sec
RG            194.26
DW            20.800 usec
DE            6.50 usec
TE            298.3 K
D1            2.00000000 sec
D11           0.03000000 sec
TD0           1
  
```

```

----- CHANNEL f1 -----
SFO1         100.6228293 MHz
NUC1          13C
P1            8.59 usec
SI            32768
SF            100.6127685 MHz
WDW           EM
SSB           0
LB            1.00 Hz
GB            0
PC            1.40
  
```

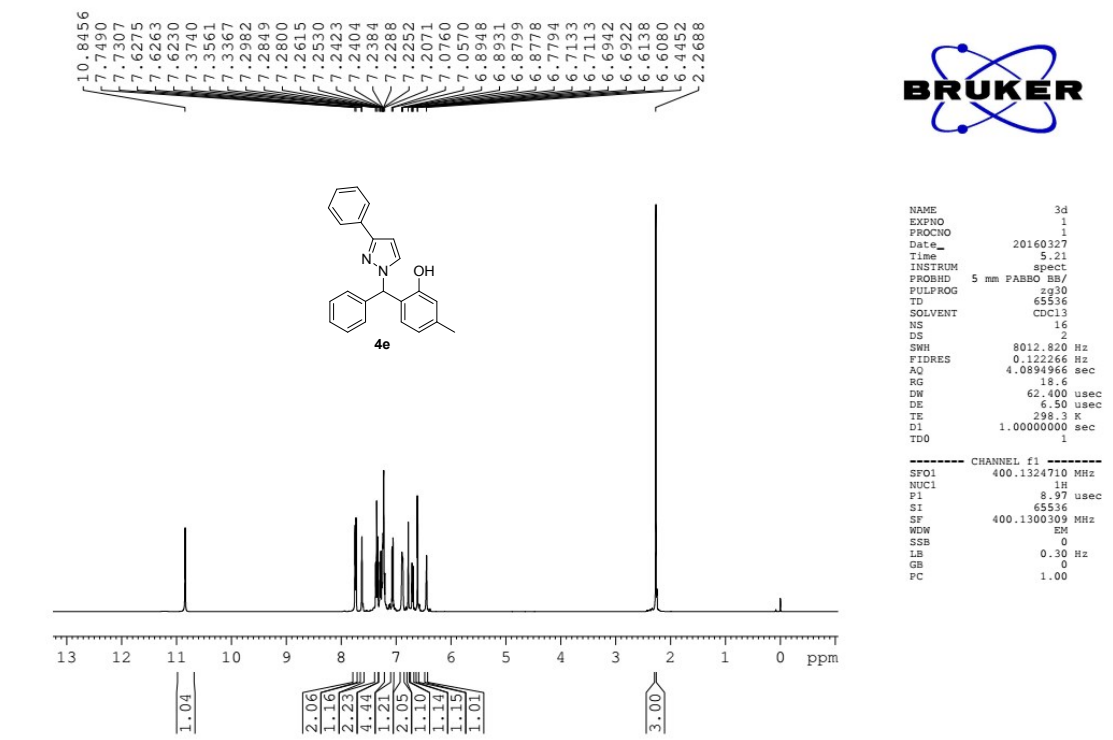

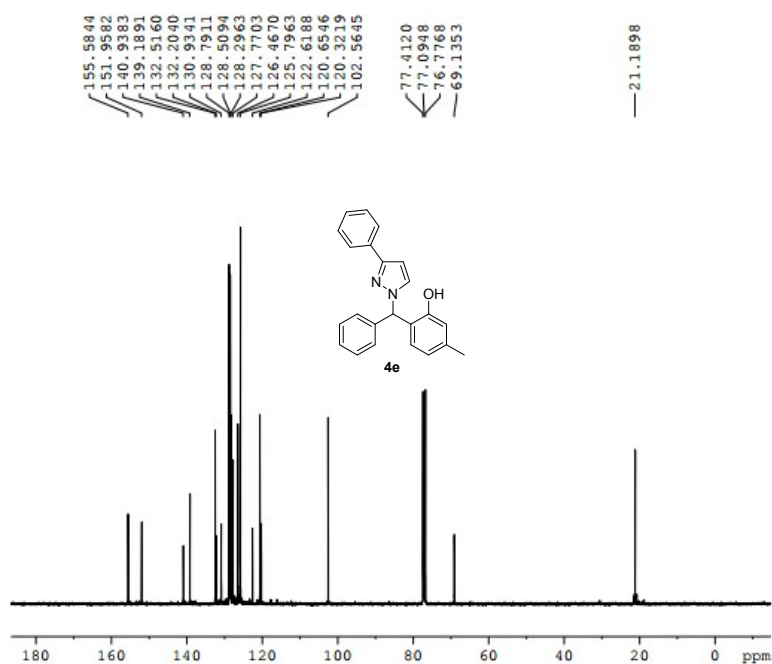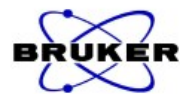

```

NAME          3d
EXPNO         2
PROCNO        1
Date_         20160327
Time          6.20
INSTRUM       spect
PROBHD        5 mm PABBO BB/
PULPROG       zgpg30
TD            65536
SOLVENT       CDCl3
NS            1024
DS            4
SWH           24038.461 Hz
FIDRES        0.366798 Hz
AQ            1.3631988 sec
RG            194.26
DW            20.800 usec
DE            6.50 usec
TE            298.3 K
D1            2.00000000 sec
D11           0.03000000 sec
TD0           1

----- CHANNEL f1 -----
SF01          100.6228293 MHz
NUC1          13C
P1            8.59 usec
SI            32768
SF            100.6127685 MHz
WDW           EM
SSB           0
LB            1.00 Hz
GB            0
PC            1.40

```

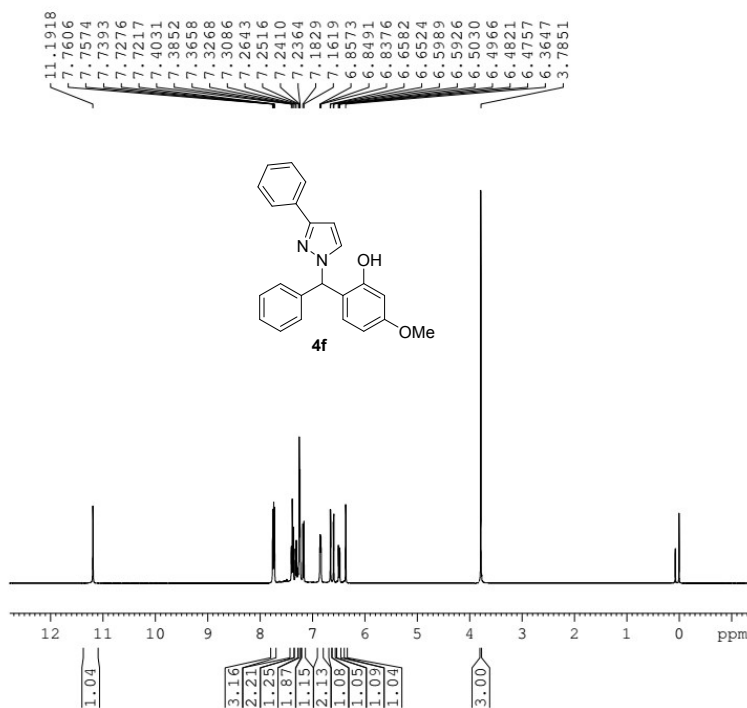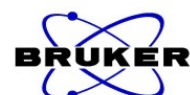

```

NAME          3e
EXPNO         1
PROCNO        1
Date_         20160327
Time          4.16
INSTRUM       spect
PROBHD        5 mm PABBO BB/
PULPROG       zgpg30
TD            65536
SOLVENT       CDCl3
NS            16
DS            2
SWH           8012.820 Hz
FIDRES        0.122266 Hz
AQ            4.0894966 sec
RG            70.36
DW            62.400 usec
DE            6.50 usec
TE            298.3 K
D1            1.00000000 sec
TD0           1

----- CHANNEL f1 -----
SF01          400.1324710 MHz
NUC1          1H
P1            8.97 usec
SI            65536
SF            400.1300133 MHz
WDW           EM
SSB           0
LB            0.30 Hz
GB            0
PC            1.00

```

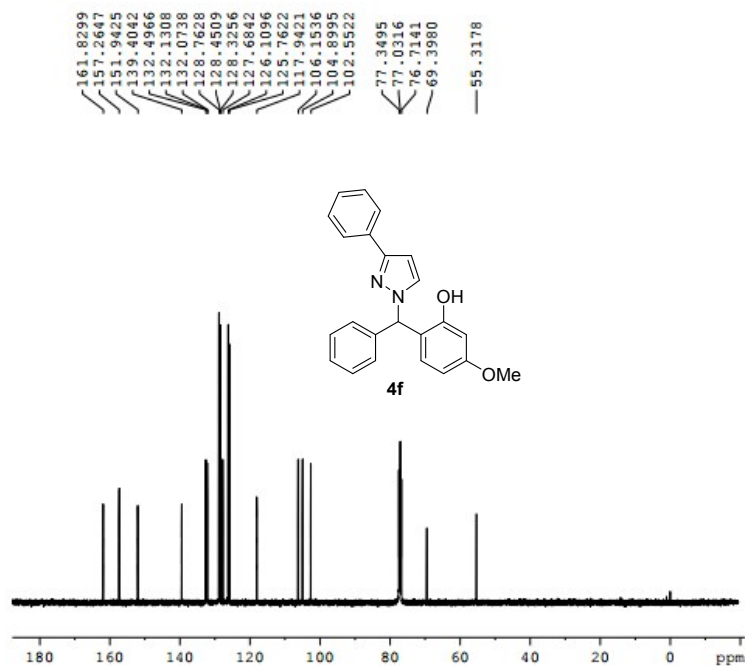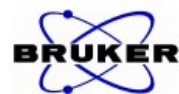

```

NAME          3e
EXPNO         1
PROCNO        1
Date_         20160327
Time          5.16
INSTRUM       spect
PROBHD        5 mm PABBO BB/
PULPROG       zgpg30
TD            65536
SOLVENT       CDCl3
NS            1024
DS            4
SWH           24038.461 Hz
FIDRES       0.366798 Hz
AQ           1.3631988 sec
RG           194.26
DW           20.800 usec
DE           6.50 usec
TE           298.3 K
SI           2.00000000 sec
Sf1           0.03000000 sec
TD0           1

----- CHANNEL f1 -----
SFO1         100.6228293 MHz
NUC1         13C
P1           8.59 usec
SI           32768
SF           100.6127485 MHz
WDW          EM
SSB           0
LB           1.00 Hz
GB           0
PC           1.40

```

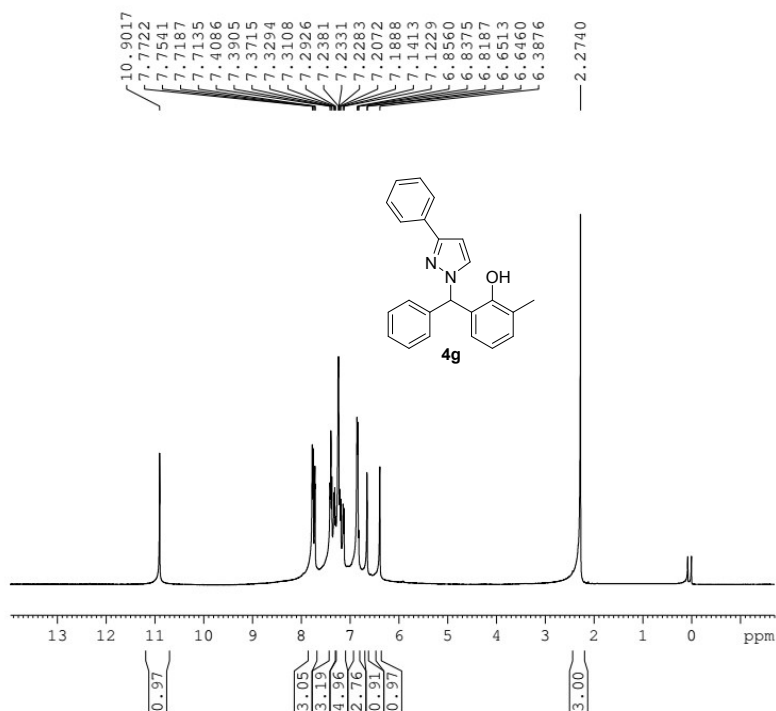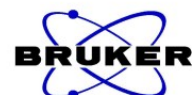

```

NAME          3b
EXPNO         1
PROCNO        1
Date_         20160327
Time          2.08
INSTRUM       spect
PROBHD        5 mm PABBO BB/
PULPROG       zg30
TD            65536
SOLVENT       CDCl3
NS            16
DS            2
SWH           8012.820 Hz
FIDRES       0.122266 Hz
AQ           4.0894966 sec
RG           57.79
DW           62.400 usec
DE           6.50 usec
TE           298.3 K
SI           1.00000000 sec
Sf1           400.1300180 MHz
WDW          EM
SSB           0
LB           0.30 Hz
GB           0
PC           1.00

```

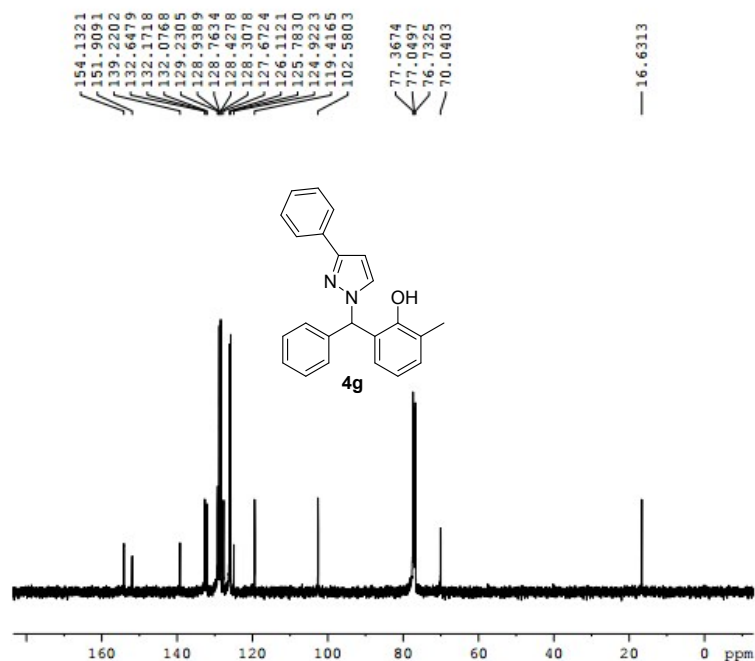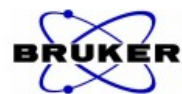

```

NAME          3b
EXPNO         2
PROCNO        1
Date_         20160327
Time          3.08
INSTRUM       spect
PROBHD        5 mm PABBO BB/
PULPROG       zgpg30
TD            65536
SOLVENT       CDCl3
NS            1024
DS            4
SWH           24038.461 Hz
FIDRES        0.364798 Hz
AQ            1.3631988 sec
RG            194.26
DW            20.800 usec
DE            6.50 usec
TE            298.3 K
D1            2.00000000 sec
D11           0.03000000 sec
TD0           1

----- CHANNEL f1 -----
SFO1          100.6228293 MHz
NUC1          13C
P1            8.59 usec
SI            32768
SF            100.6127685 MHz
WDW           EM
SSB           0
LB            1.00 Hz
GB            0
PC            1.40
  
```

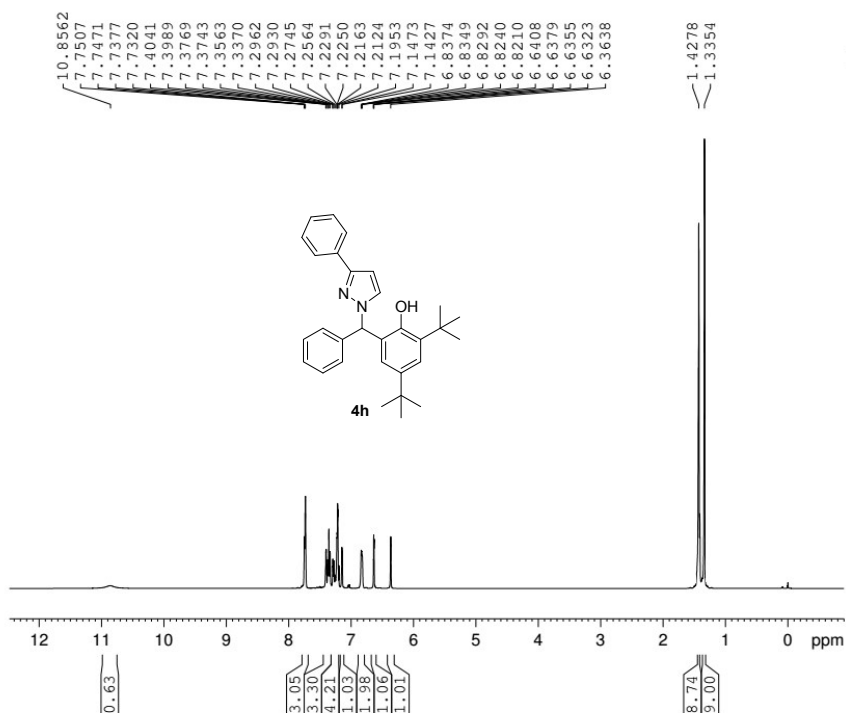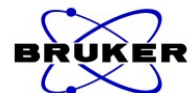

```

NAME          3i-tbu2
EXPNO         1
PROCNO        1
Date_         20160327
Time          10.42
INSTRUM       spect
PROBHD        5 mm PABBO BB/
PULPROG       zg30
TD            65536
SOLVENT       CDCl3
NS            16
DS            2
SWH           8012.820 Hz
FIDRES        0.122266 Hz
AQ            4.0894966 sec
RG            16.03
DW            62.400 usec
DE            6.50 usec
TE            298.3 K
D1            1.00000000 sec
TD0           1

----- CHANNEL f1 -----
SFO1          400.1324710 MHz
NUC1          1H
P1            8.97 usec
SI            65536
SF            400.1300356 MHz
WDW           EM
SSB           0
LB            0.30 Hz
GB            0
PC            1.00
  
```

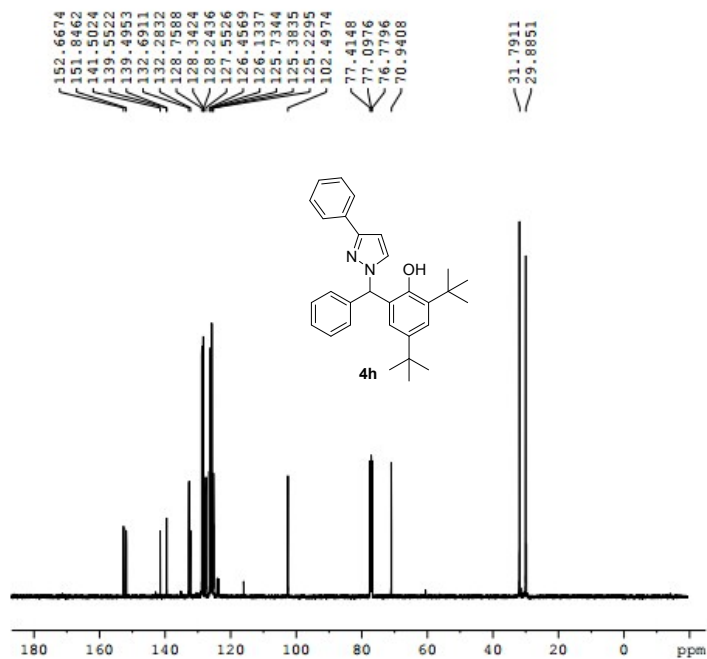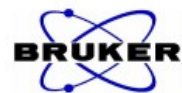

```

NAME      3i-ebu2
EXPNO     2
PROCNO    1
Date_     20160329
Time      9.35
INSTRUM   spect
PROBHD    5 mm PABBO BB/
PULPROG   zgpg30
TD         65536
SOLVENT   CDCl3
NS         512
DS         4
SWH        24038.461 MHz
FIDRES     0.366798 MHz
AQ         1.3651988 sec
RG         194.26
DM         20.850
DE         6.50
TE         298.3 K
D1         2.00000000 sec
D11        0.03000000 sec
TD0        1

----- CHANNEL f1 -----
SFO1      100.6228293 MHz
NUC1       13C
P1         8.59 usec
SI         32768
SF         100.6127685 MHz
WOW        EM
SSB        0
LB         1.00 MHz
GB         0
PC         1.40

```

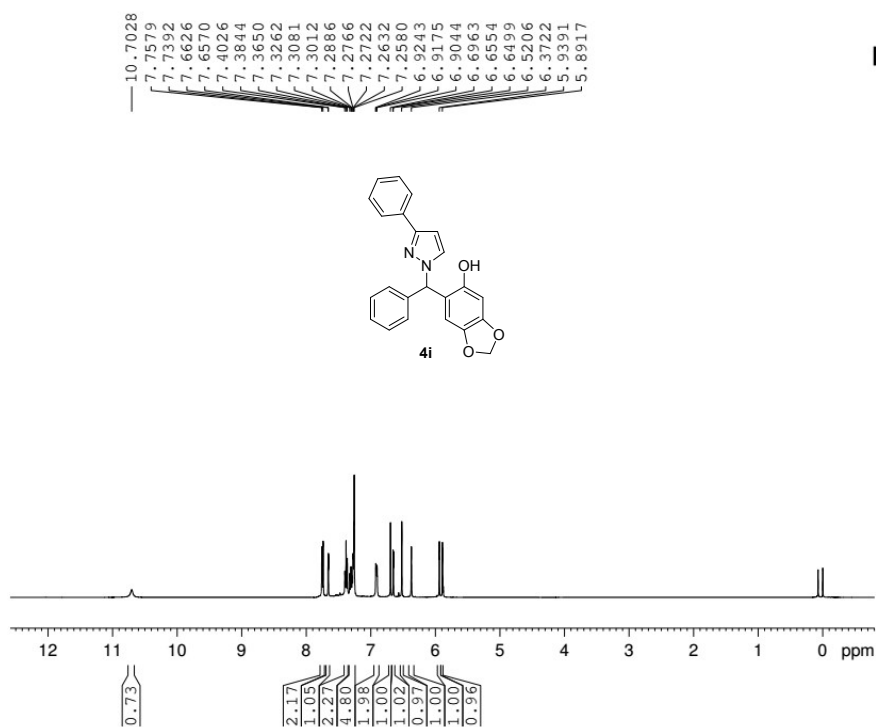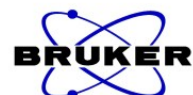

```

NAME      YJL-LQH-Z104192mfz
EXPNO     1
PROCNO    1
Date_     20160421
Time      13.18
INSTRUM   spect
PROBHD    5 mm PABBO BB/
PULPROG   zg30
TD         65536
SOLVENT   CDCl3
NS         16
DS         2
SWH        8012.820 MHz
FIDRES     0.122266 MHz
AQ         4.0894966 sec
RG         57.79
DM         62.400 usec
DE         6.50 usec
TE         298.0 K
D1         1.00000000 sec
TD0        1

----- CHANNEL f1 -----
SFO1      400.1324710 MHz
NUC1       1H
P1         8.97 usec
SI         65536
SF         400.1300109 MHz
WOW        EM
SSB        0
LB         0.30 MHz
GB         0
PC         1.00

```

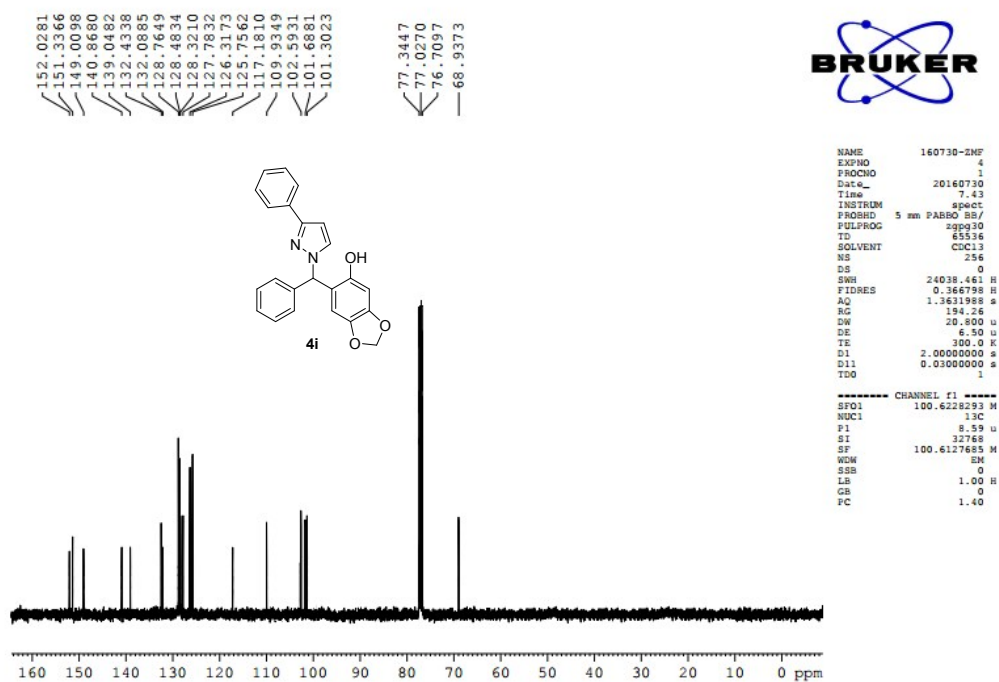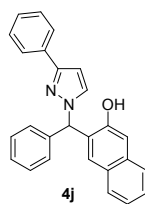

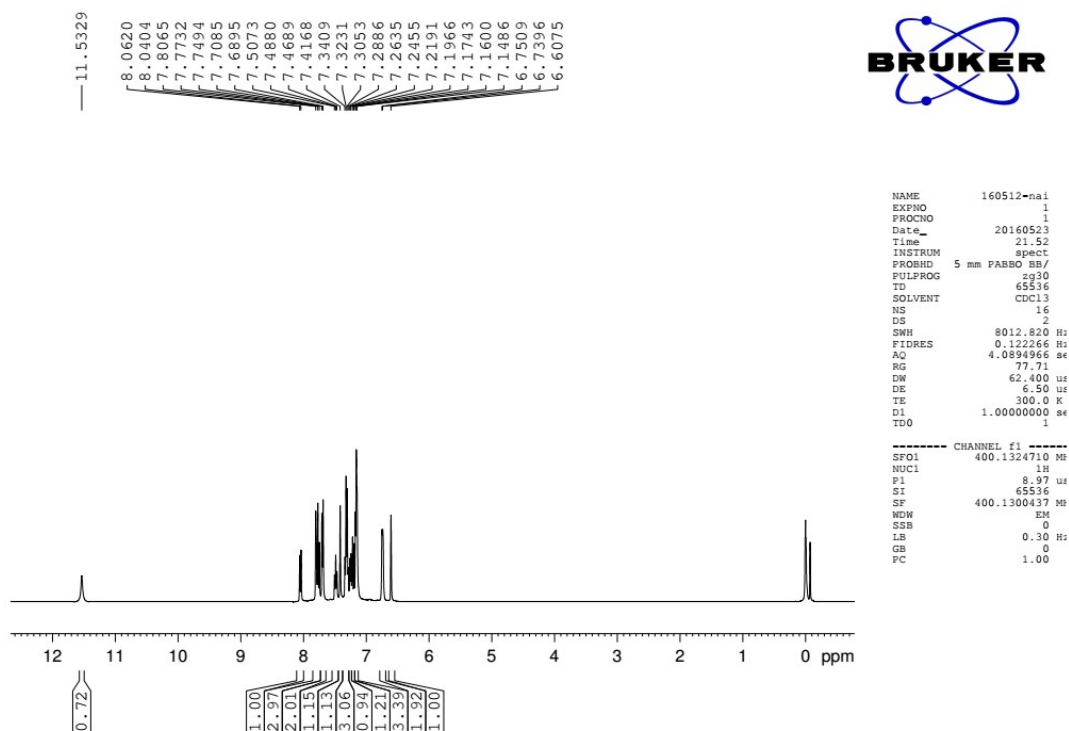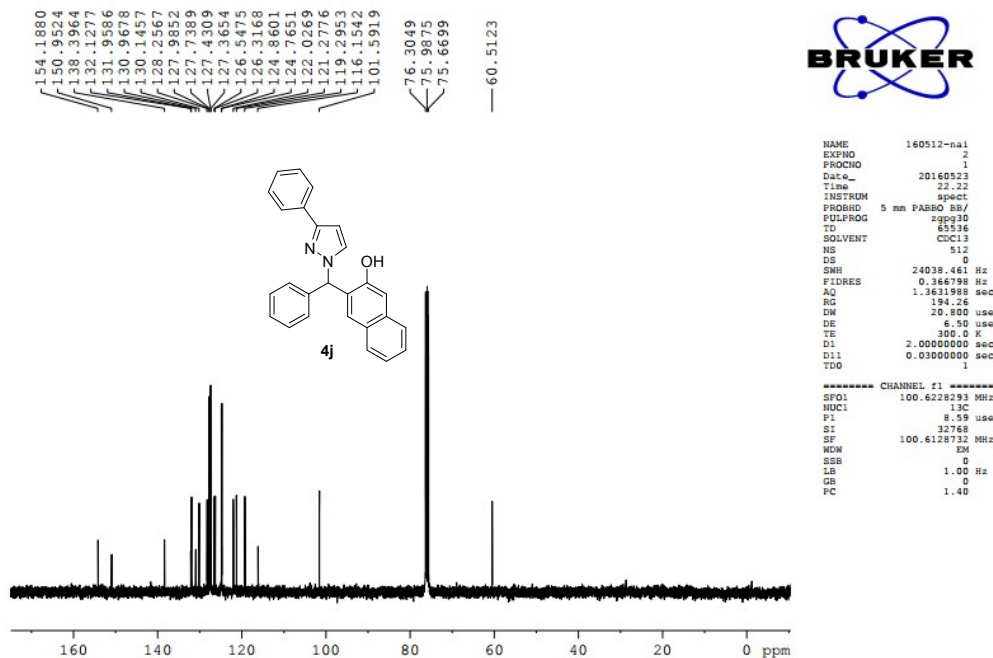



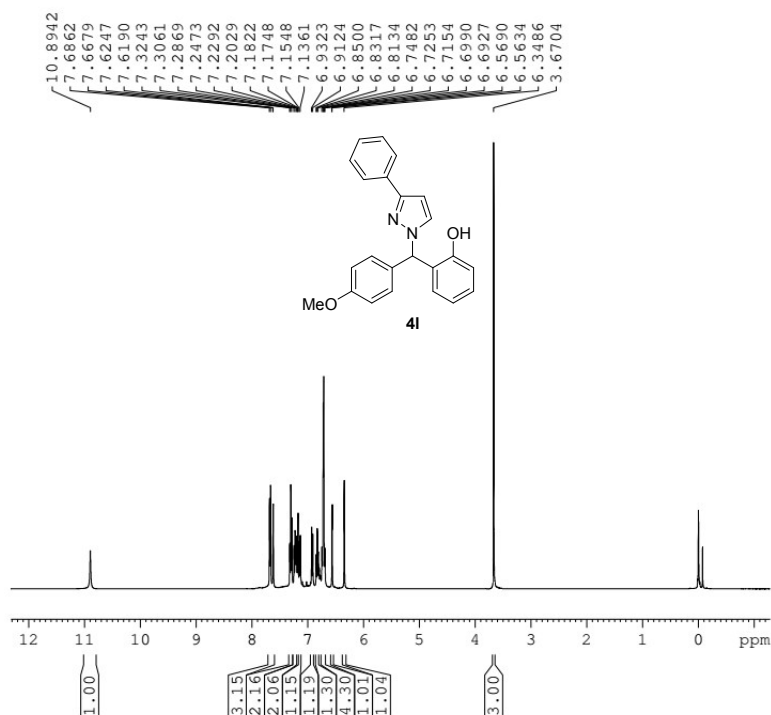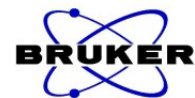

```

NAME      3j-m-ome
EXPNO     1
PROCNO    1
Date_     20160329
Time      18.46
INSTRUM   spect
PROBHD    5 mm PABBO BB/
PULPROG   zg30
TD         65536
SOLVENT   CDCl3
NS         16
DS         2
SWH        8012.820 Hz
FIDRES     0.122266 Hz
AQ         4.0894966 sec
RG         32.77
DW         62.400 usec
DE         6.50 usec
TE         298.3 K
D1         1.00000000 sec
TD0        1

----- CHANNEL f1 -----
SFO1      400.1324710 MHz
NUC1       1H
P1         8.97 usec
SI         65536
SF         400.1300440 MHz
WDW        EM
SSB        0
LB         0.30 Hz
GB         0
PC         1.00

```

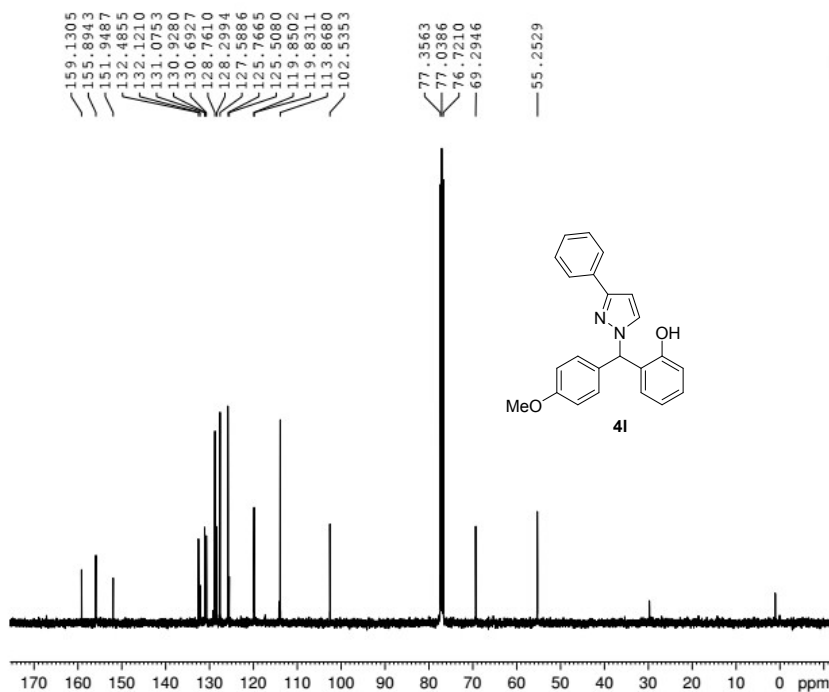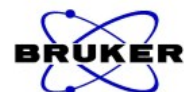

```

NAME      3j-p-ome
EXPNO     2
PROCNO    1
Date_     20160329
Time      19.17
INSTRUM   spect
PROBHD    5 mm PABBO BB/
PULPROG   zgpg30
TD         65536
SOLVENT   CDCl3
NS         512
DS         4
SWH        24038.461 H
FIDRES     0.366798 H
AQ         1.3631988 s
RG         194.26
DW         20.800 u
DE         6.50 u
TE         298.3 K
D1         2.00000000 s
D11        0.03000000 s
TD0        1

----- CHANNEL f1 -----
SFO1      100.6228293 M
NUC1       13C
P1         8.59 u
SI         32768
SF         100.6127685 M
WDW        EM
SSB        0
LB         1.00 H
GB         0
PC         1.40

```

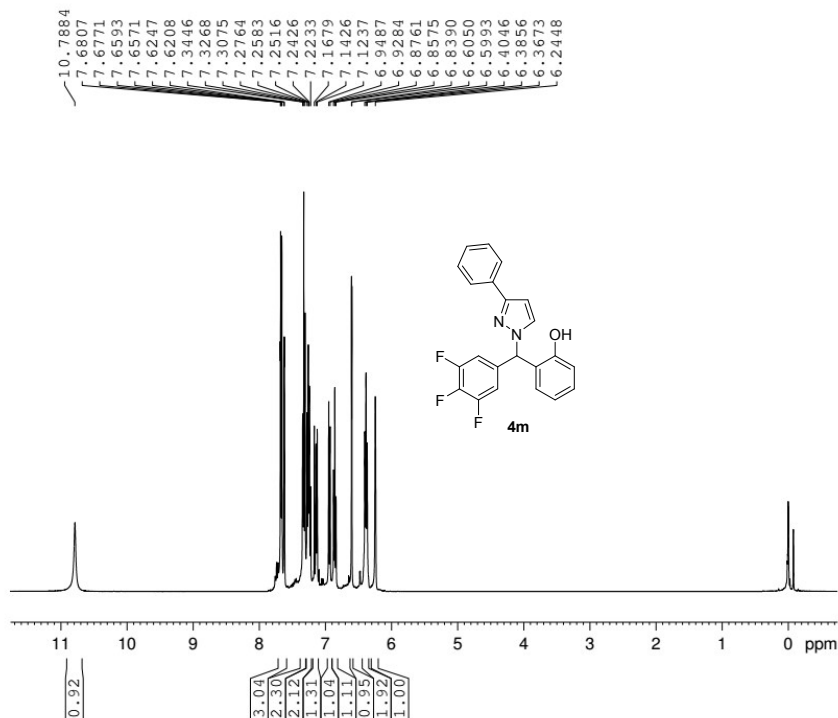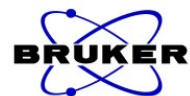

NAME 31-345f  
EXFNO 1  
PROCNO 1  
Date\_ 20160329  
Time 20.28  
INSTRUM spect  
PROBHD 5 mm PABBO BB/  
PULPROG zg30  
TD 65536  
SOLVENT CDCl3  
NS 16  
DS 2  
SWH 8012.820 Hz  
FIDRES 0.122266 Hz  
AQ 4.0894966 sec  
RG 32.77  
DW 62.400 usec  
DE 6.50 usec  
TE 298.3 K  
D1 1.00000000 sec  
D11 1  
TDO

----- CHANNEL f1 -----  
SFO1 400.1324710 MHz  
NUC1 1H  
P1 8.97 usec  
SI 65536  
SF 400.1300467 MHz  
WDW EM  
SSB 0  
LB 0.30 Hz  
GB 0  
PC 1.00

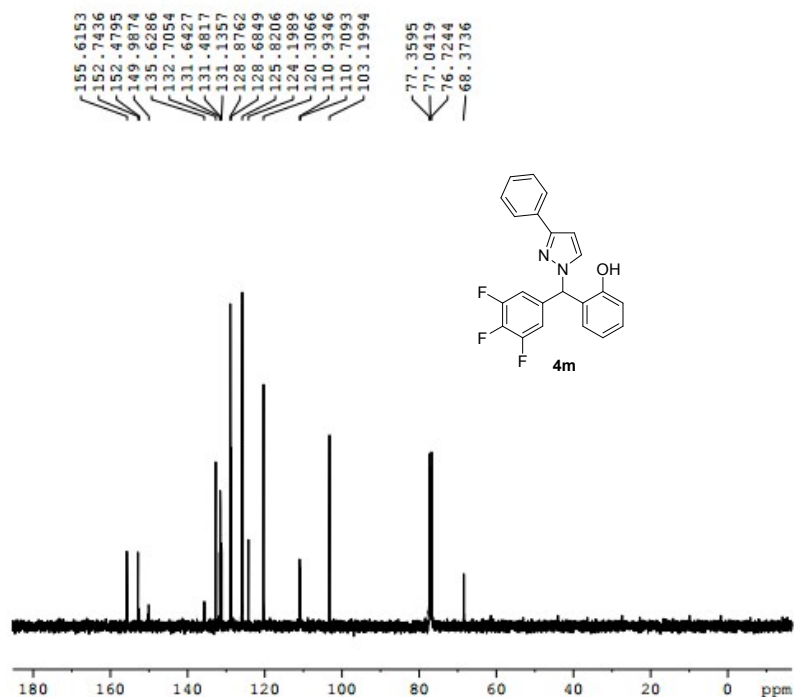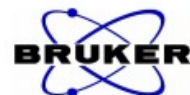

NAME 31-345f  
EXFNO 2  
PROCNO 1  
Date\_ 20160329  
Time 20.30  
INSTRUM spect  
PROBHD 5 mm PABBO BB/  
PULPROG zgpg30  
TD 65536  
SOLVENT CDCl3  
NS 256  
DS 4  
SWH 24038.461 Hz  
FIDRES 0.366798 Hz  
AQ 1.3631988 sec  
RG 194.26  
DW 20.800 usec  
DE 6.50 usec  
TE 298.3 K  
D1 2.00000000 sec  
D11 0.03000000 sec  
TDO 1

----- CHANNEL f1 -----  
SFO1 100.6228293 MHz  
NUC1 13C  
P1 8.59 usec  
SI 32768  
SF 100.6127685 MHz  
WDW EM  
SSB 0  
LB 1.00 Hz  
GB 0  
PC 1.40

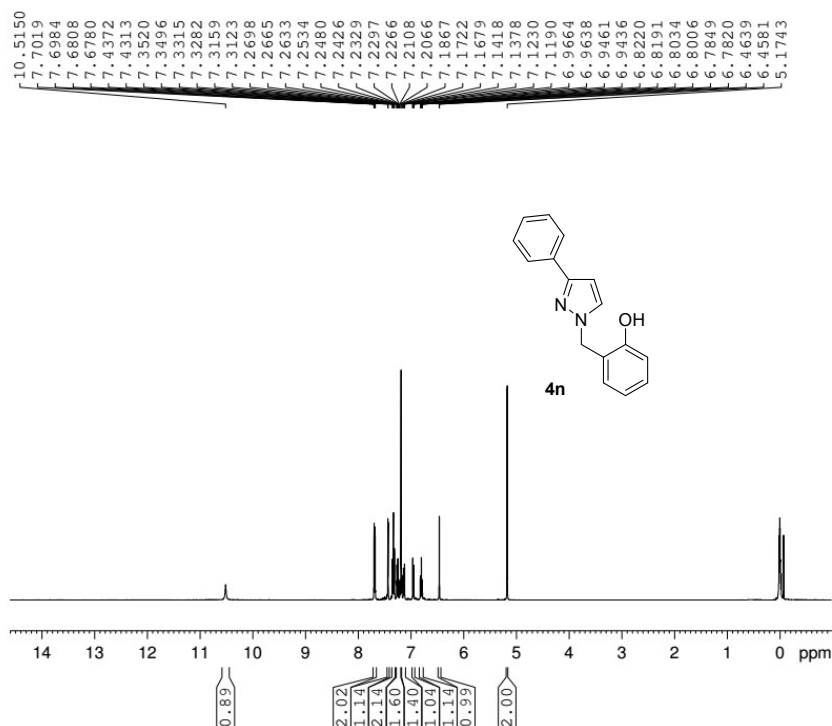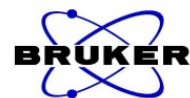

```

NAME      160730-SYC-up
EXPNO     1
PROCNO    1
Date_     20160730
Time      8.28
INSTRUM   spect
PROBHD    5 mm PABBO BB/
PULPROG   zg30
TD         65536
SOLVENT   CDCl3
NS         16
DS         2
SWH        8012.820 H
FIDRES     0.122266 H
AQ         4.0894966 s
RG         70.36
DW         62.400 u
DE         6.50 u
TE         300.0 K
D1         1.00000000 s
TD0        1

----- CHANNEL f1 -----
SFO1      400.1324710 M
NUC1       1H
P1         8.97 u
SI         65536
SF         400.1300391 M
WDW        EM
SSB        0
LB         0.30 H
GB         0
PC         1.00

```

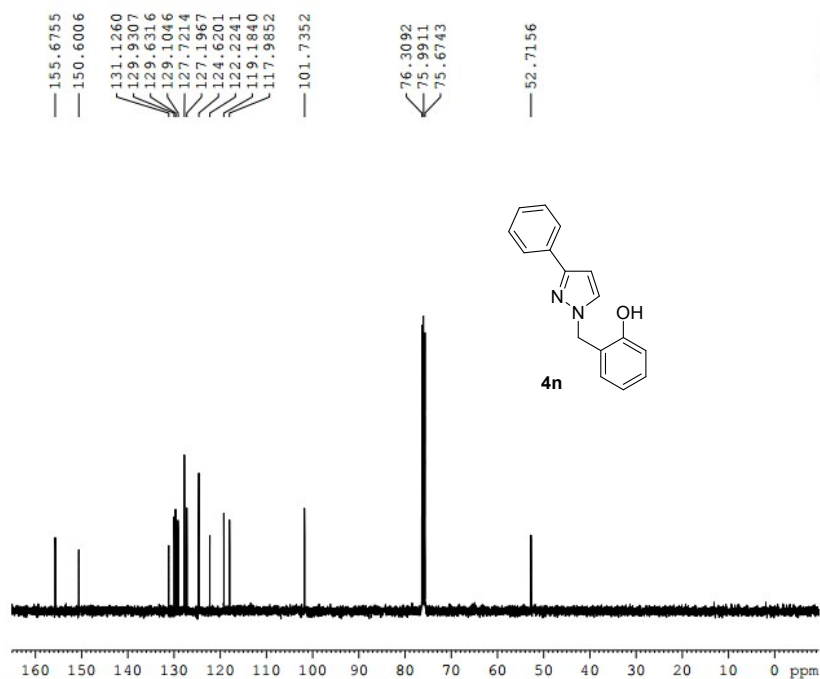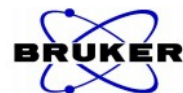

```

NAME      160730-SYC-up
EXPNO     2
PROCNO    1
Date_     20160730
Time      8.43
INSTRUM   spect
PROBHD    5 mm PABBO BB/
PULPROG   zgpg30
TD         65536
SOLVENT   CDCl3
NS         256
DS         0
SWH        24038.451 Hz
FIDRES     0.366798 Hz
AQ         1.3631988 sec
RG         194.26
DW         20.800 usec
DE         6.50 usec
TE         300.0 K
D1         2.00000000 sec
D11        0.03000000 sec
TD0        1

----- CHANNEL f1 -----
SFO1      100.6228293 MHz
NUC1       13C
P1         8.59 usec
SI         32768
SF         100.6128719 MHz
WDW        EM
SSB        0
LB         1.00 Hz
GB         0
PC         1.40

```

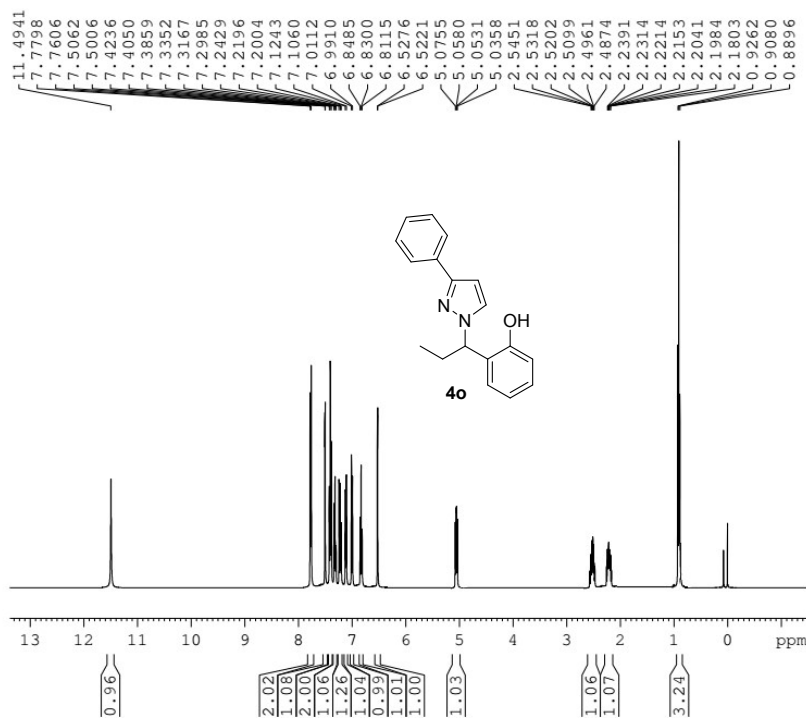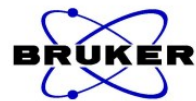

NAME 3m-et  
EXPNO 1  
PROCNO 1  
Date\_ 20160329  
Time 19.22  
INSTRUM spect  
PROBHD 5 mm PABBO BB/  
PULPROG zg30  
TD 65536  
SOLVENT CDCl3  
NS 16  
DS 2  
SWH 8012.820 Hz  
FIDRES 0.122266 Hz  
AQ 4.0894966 sec  
RG 32.77  
DW 62.400 usec  
DE 6.50 usec  
TE 298.3 K  
D1 1.00000000 sec  
TD0 1

----- CHANNEL f1 -----  
SFO1 400.1324710 MHz  
NUC1 1H  
P1 8.97 usec  
SI 65536  
SF 400.1300166 MHz  
WDW EM  
SSB 0  
LB 0.30 Hz  
GB 0  
PC 1.00

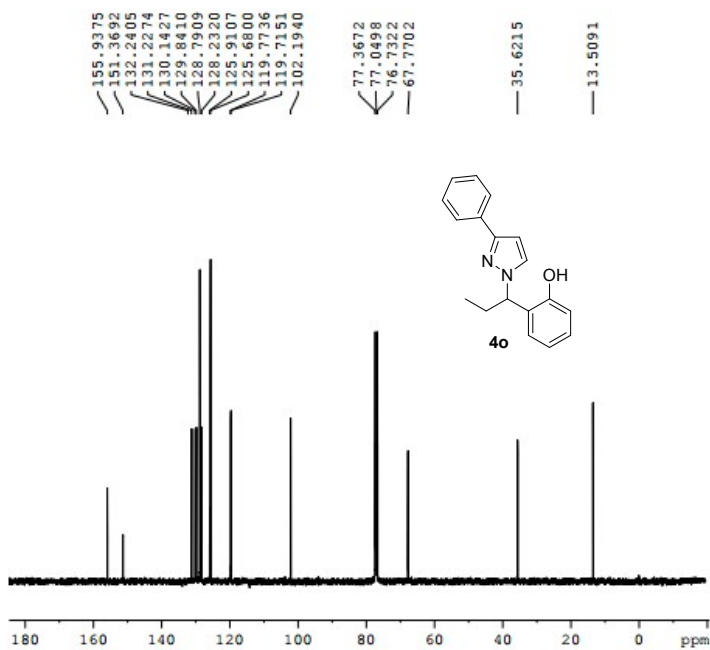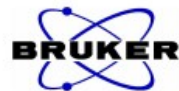

NAME 3m-et  
EXPNO 2  
PROCNO 1  
Date\_ 20160329  
Time 19.53  
INSTRUM spect  
PROBHD 5 mm PABBO BB/  
PULPROG zg30  
TD 65536  
SOLVENT CDCl3  
NS 512  
DS 4  
SWH 24038.461 Hz  
FIDRES 0.366798 Hz  
AQ 1.3631988 sec  
RG 194.26  
DW 20.800 usec  
DE 6.50 usec  
TE 298.3 K  
D1 2.00000000 sec  
D11 0.03000000 sec  
TD0 1

----- CHANNEL f1 -----  
SFO1 100.6228293 MHz  
NUC1 13C  
P1 8.59 usec  
SI 32768  
SF 100.6127685 MHz  
WDW EM  
SSB 0  
LB 1.00 Hz  
GB 0  
PC 1.40

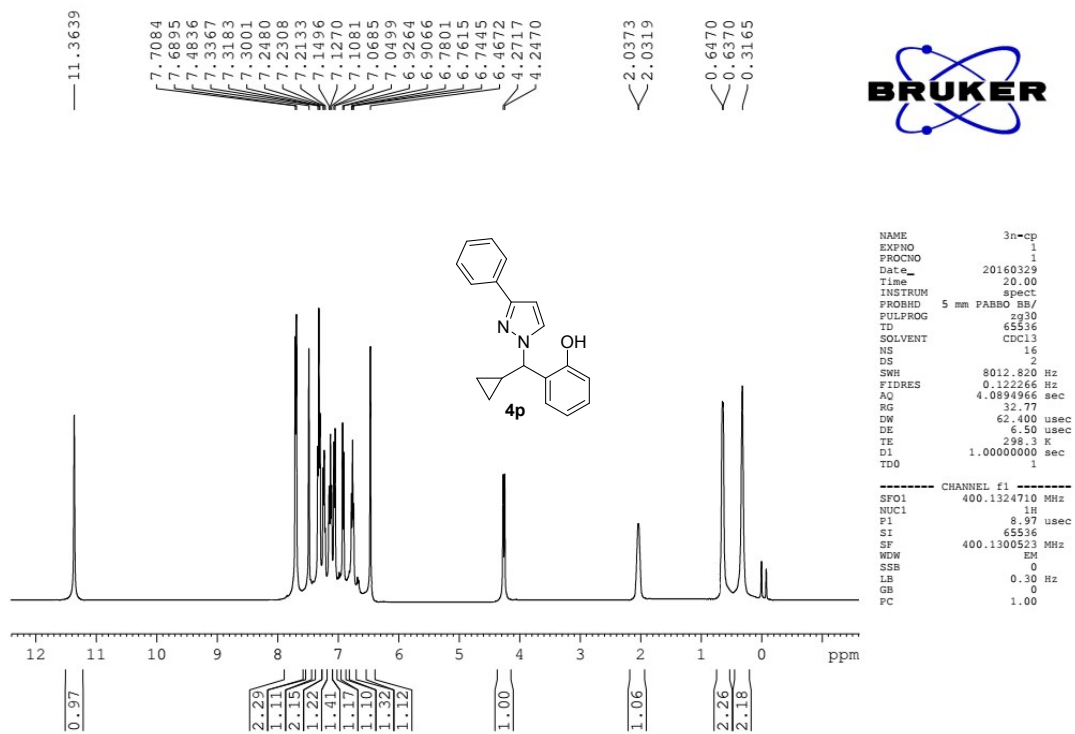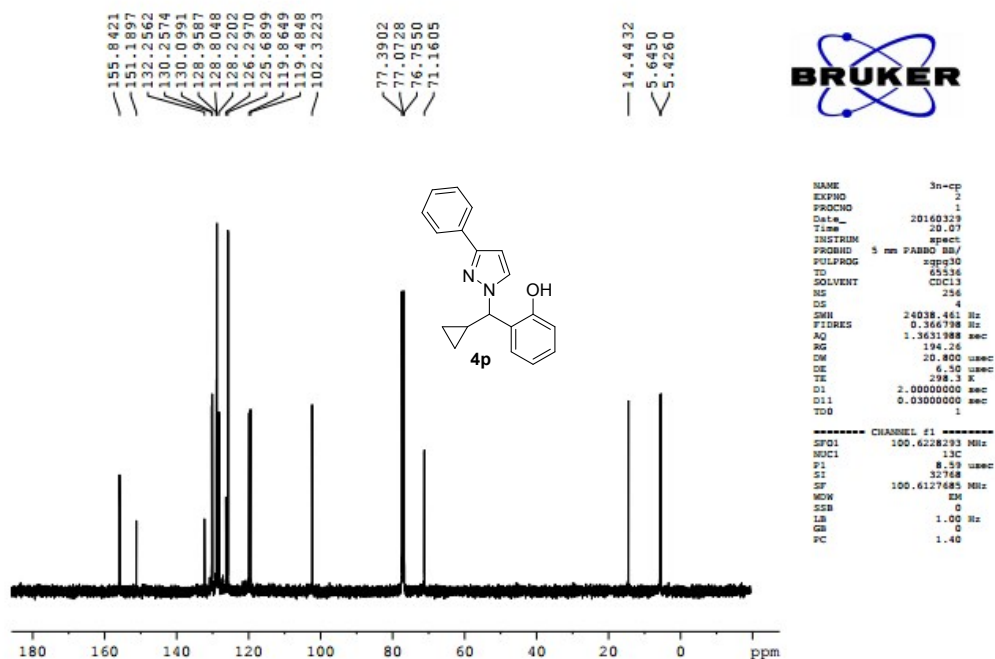

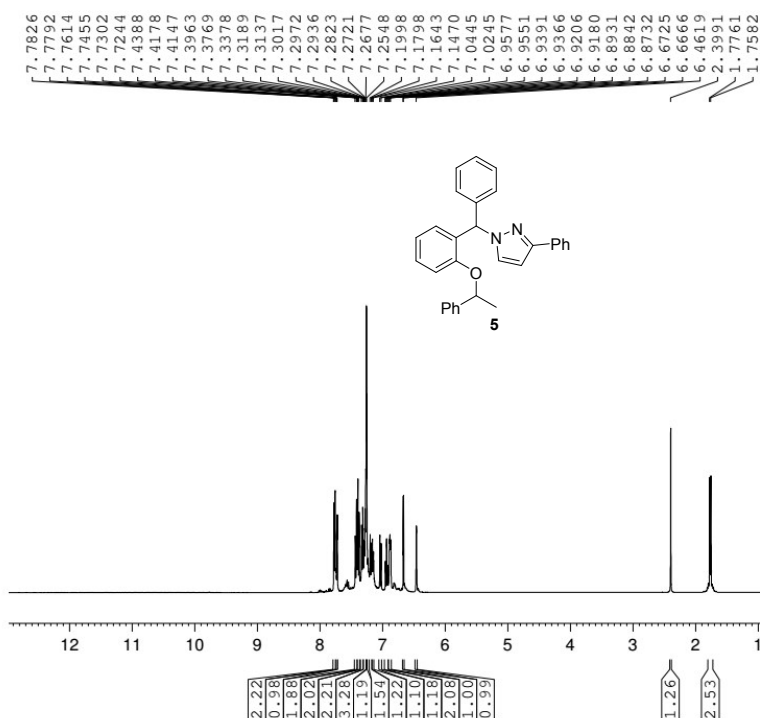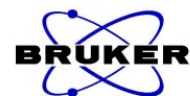

NAME 171025-J1-170901-6y  
 EXPNO 1  
 PROCNO 1  
 Date\_ 20171025  
 Time 14.10  
 INSTRUM spect  
 PROBHD 5 mm PABBO BB/  
 PULPROG zg30  
 TD 65536  
 SOLVENT cdcl3  
 NS 12  
 DS 0  
 SWH 8012.820 Hz  
 FIDRES 0.122266 Hz  
 AQ 4.0894966 sec  
 RG 26.24  
 DW 62.400 usec  
 DE 6.50 usec  
 TE 300.0 K  
 D1 1.00000000 sec  
 TD0 1

CHANNEL f1  
 SFO1 400.1324710 MHz  
 NUC1 1H  
 P1 8.04 usec  
 SI 65536  
 SF 400.1300099 MHz  
 WDW EM  
 SSB 0  
 LB 0.30 Hz  
 GB 0  
 PC 1.00

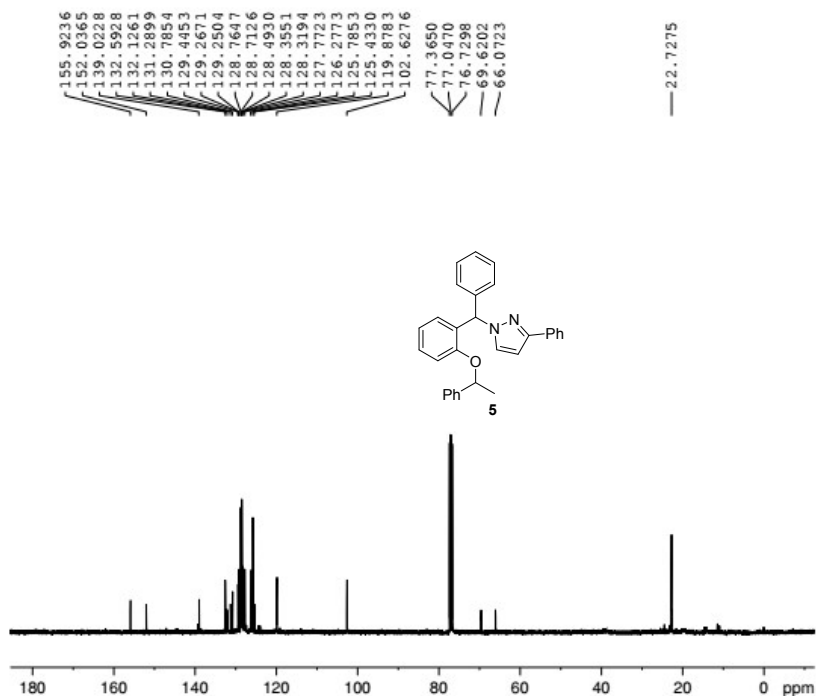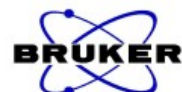

NAME 171025-J1-170901-6y  
 EXPNO 2  
 PROCNO 1  
 Date\_ 20171101  
 Time 19.43  
 INSTRUM spect  
 PROBHD 5 mm PABBO BB/  
 PULPROG zgpg30  
 TD 65536  
 SOLVENT cdcl3  
 NS 432  
 DS 0  
 SWH 24038.461 Hz  
 FIDRES 0.366798 Hz  
 AQ 1.3631988 sec  
 RG 194.26  
 DW 20.800 usec  
 DE 6.50 usec  
 TE 300.0 K  
 D1 2.00000000 sec  
 D11 0.03000000 sec  
 TD0 1

CHANNEL f1  
 SFO1 100.6228293 MHz  
 NUC1 13C  
 P1 8.54 usec  
 SI 32768  
 SF 100.6127685 MHz  
 WDW EM  
 SSB 0  
 LB 1.00 Hz  
 GB 0  
 PC 1.40

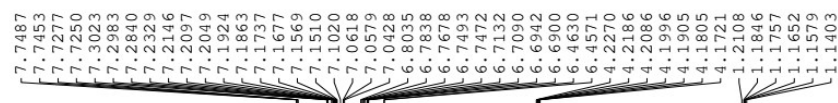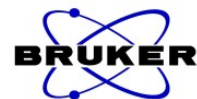

NAME YSY-XAJ-N15=huanji  
EXPNO 1  
PROCNO 1  
Date\_ 20180122  
Time 19.28  
INSTRUM spect  
PROBHD 5 mm PABBO BB/  
PULPROG zg30  
TD 65536  
SOLVENT CDCl3  
NS 12  
DS 0  
SWH 8012.820 Hz  
FIDRES 0.122266 Hz  
AQ 4.0894966 sec  
RG 51.19  
DW 62.400 usec  
DE 6.50 usec  
TE 300.0 K  
D1 1.0000000 sec  
TD0 1

----- CHANNEL f1 -----  
SFO1 400.1324710 MHz  
NUC1 1H  
P1 8.04 usec  
SI 65536  
SF 400.1300441 MHz  
WDW EM  
SSB 0  
LB 0.30 Hz  
GB 0  
PC 1.00

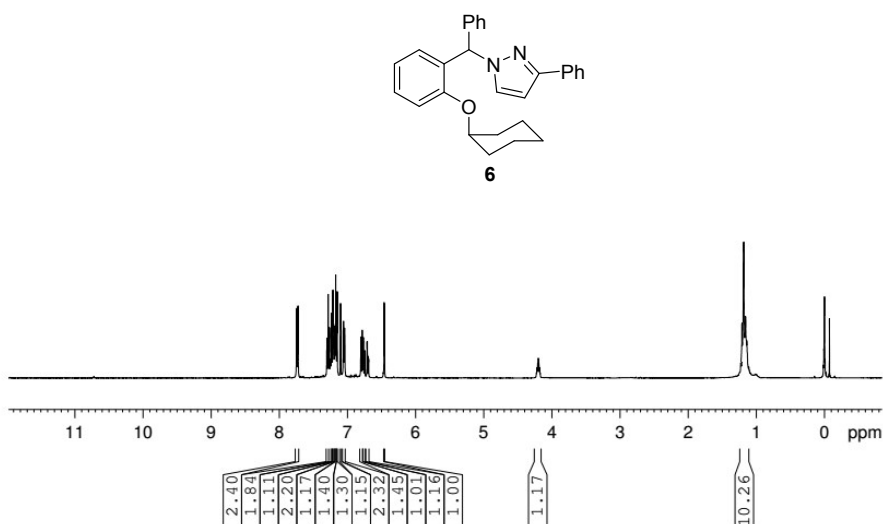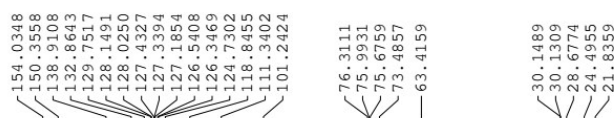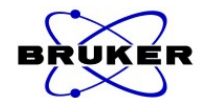

NAME YSY-XAJ-N15=huanj  
EXPNO 2  
PROCNO 1  
Date\_ 20180122  
Time 19.58  
INSTRUM spect  
PROBHD 5 mm PABBO BB/  
PULPROG zgpg30  
TD 65536  
SOLVENT CDCl3  
NS 512  
DS 0  
SWH 24038.461 Hz  
FIDRES 0.366798 Hz  
AQ 1.3631988 se  
RG 194.26  
DW 20.800 us  
DE 6.50 us  
TE 300.1 K  
D1 2.0000000 se  
D11 0.03000000 se  
TD0 1

----- CHANNEL f1 -----  
SFO1 100.6228293 MHz  
NUC1 13C  
P1 8.54 usec  
SI 32768  
SF 100.6128730 MHz  
WDW EM  
SSB 0  
LB 1.00 Hz  
GB 0  
PC 1.40

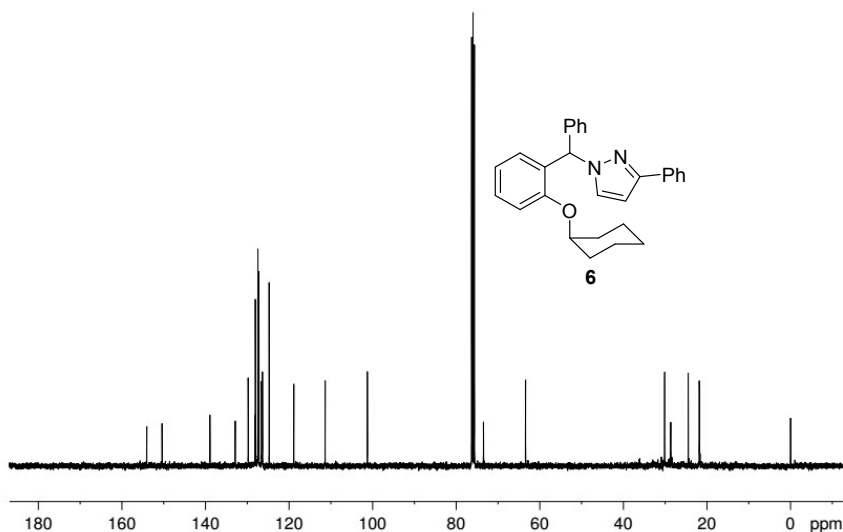

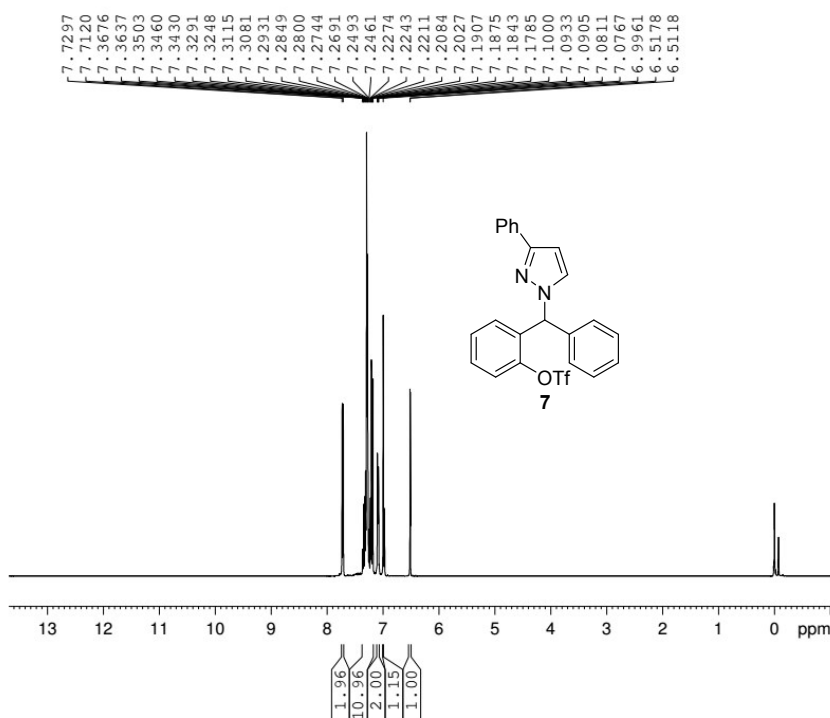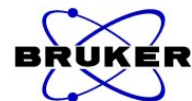

NAME 160730-step1  
EXPNO 5  
PROCNO 1  
Date\_ 20160730  
Time 4.47  
INSTRUM spect  
PROBHD 5 mm PABBO BB/  
PULPROG zg30  
TD 65536  
SOLVENT CDCl3  
NS 16  
DS 2  
SWH 8012.820  
FIDRES 0.122266  
AQ 4.0894966  
RG 70.36  
DW 62.400  
DE 6.50  
TE 300.1  
D1 1.00000000  
TD0 1

----- CHANNEL f1 -----  
SF01 400.1324710  
NUC1 1H  
P1 8.97  
SI 65536  
SF 400.1300424  
WDW EM  
SSB 0  
LB 0.30  
GB 0  
PC 1.00

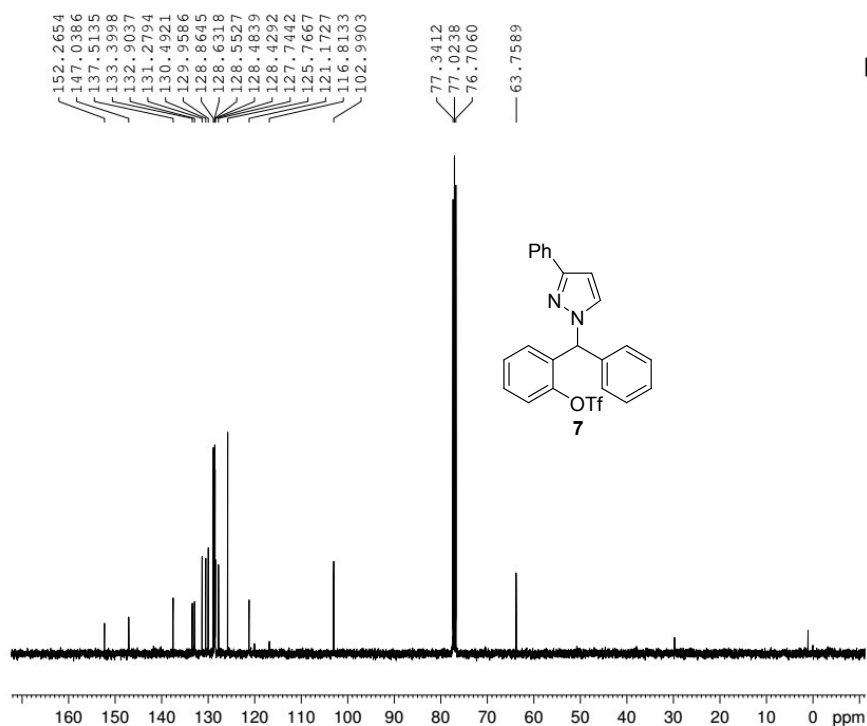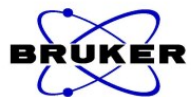

NAME 160730-step1  
EXPNO 6  
PROCNO 1  
Date\_ 20160730  
Time 5.03  
INSTRUM spect  
PROBHD 5 mm PABBO BB/  
PULPROG zgpg30  
TD 65536  
SOLVENT CDCl3  
NS 256  
DS 0  
SWH 24038.461  
FIDRES 0.366798  
AQ 1.3631988  
RG 194.26  
DW 20.800  
DE 6.50  
TE 300.0  
D1 2.00000000  
D11 0.03000000  
TD0 1

----- CHANNEL f1 -----  
SF01 100.6228293  
NUC1 13C  
P1 8.59  
SI 32768  
SF 100.6127685  
WDW EM  
SSB 0  
LB 1.00  
GB 0  
PC 1.40

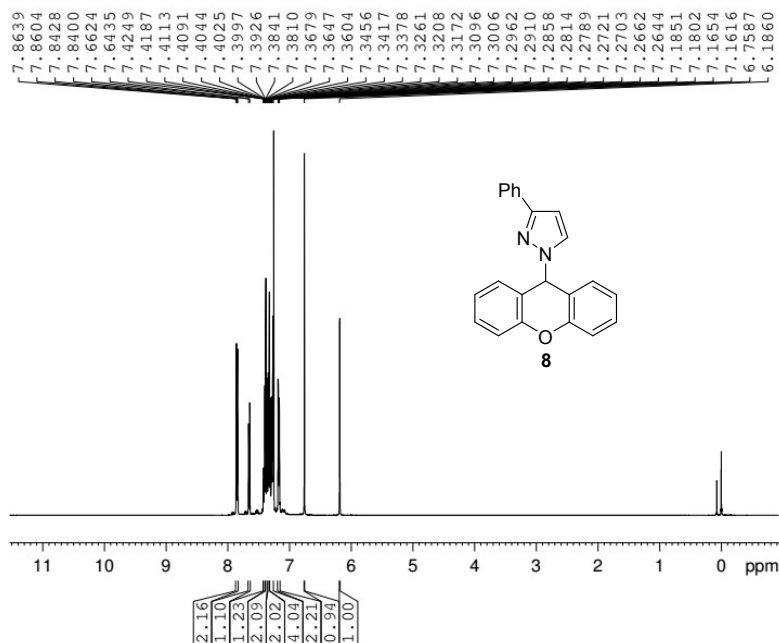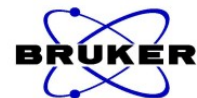

```

NAME      160730-step2-down:
EXPNO     5
PROCNO    1
Date_     20160730
Time      3.27
INSTRUM   spect
PROBHD    5 mm PABBO BB/
PULPROG   zg30
TD         65536
SOLVENT   CDCl3
NS         16
DS         2
SWH        8012.820 Hz
FIDRES     0.122266 Hz
AQ         4.0894966 sec
RG         77.71
DW         62.400 usec
DE         6.50 usec
TE         300.0 K
D1         1.00000003 sec
TD0        1
  
```

```

----- CHANNEL f1 -----
SFO1      400.1324710 MHz:
NUC1       1H
P1         8.97 usec
SI         65536
SF         400.1300118 MHz:
WDW        EM
SSB        0
LB         0.30 Hz
GB         0
PC         1.00
  
```

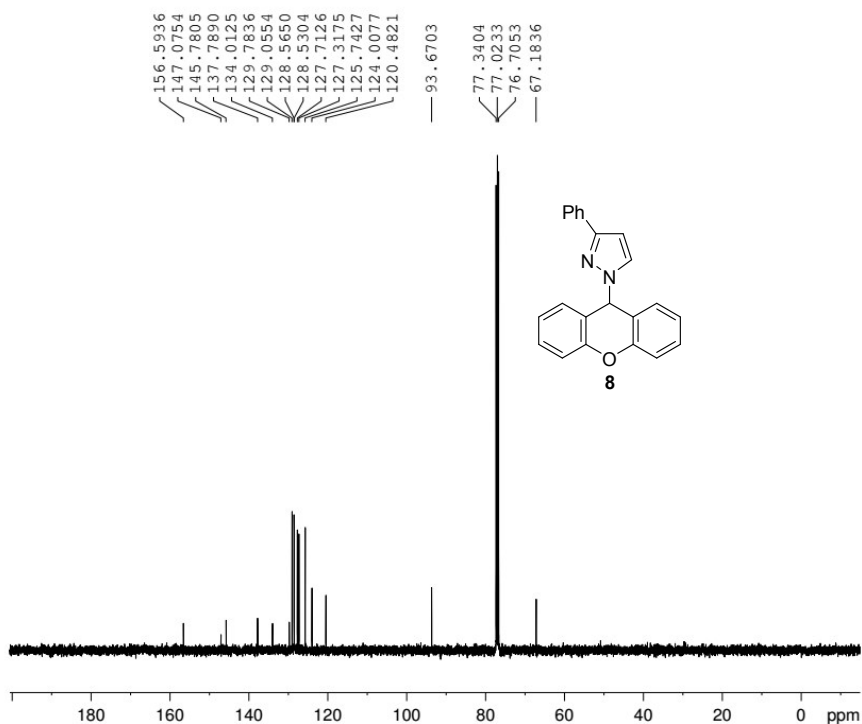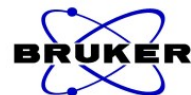

```

NAME      160730-step2-down:
EXPNO     6
PROCNO    1
Date_     20160730
Time      3.43
INSTRUM   spect
PROBHD    5 mm PABBO BB/
PULPROG   zgpg30
TD         65536
SOLVENT   CDCl3
NS         256
DS         0
SWH        24038.461 Hz
FIDRES     0.366798 Hz
AQ         1.3631988 sec
RG         194.26
DW         20.800 usec
DE         6.50 usec
TE         300.0 K
D1         2.00000000 sec
D11        0.03000000 sec
TD0        1
  
```

```

----- CHANNEL f1 -----
SFO1      100.6228293 MHz:
NUC1       13C
P1         8.59 usec
SI         32768
SF         100.6127685 MHz:
WDW        EM
SSB        0
LB         1.00 Hz
GB         0
PC         1.40
  
```

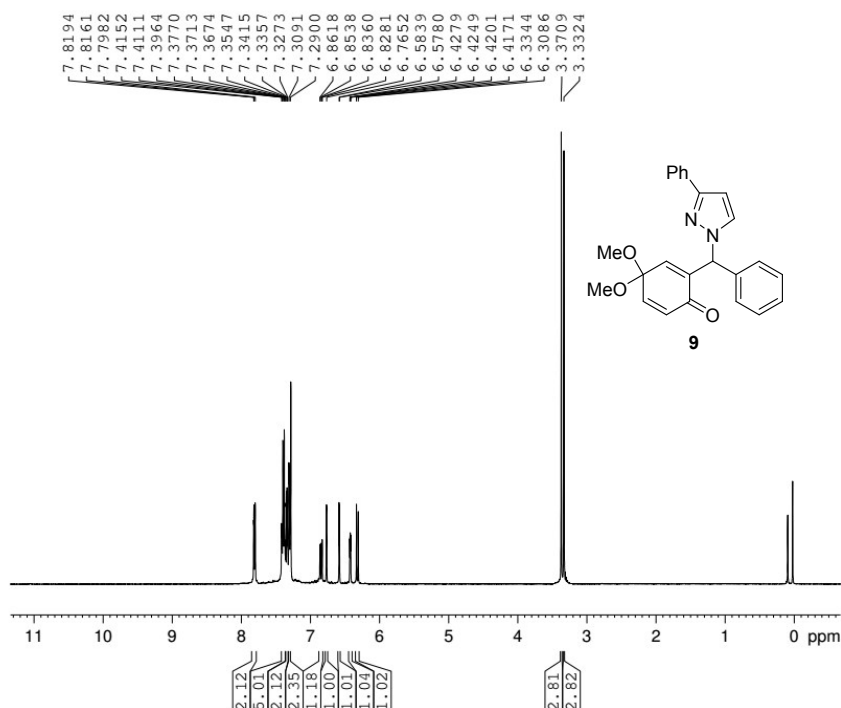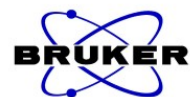

NAME 180128-yanshengyan  
 EXPNO 1  
 PROCNO 1  
 Date\_ 20180128  
 Time 14.41  
 INSTRUM spect  
 PROBHD 5 mm PABBO BB-  
 PULPROG zg30  
 TD 65536  
 SOLVENT CDCl3  
 NS 16  
 DS 2  
 SWH 8223.685 Hz  
 FIDRES 0.125483 Hz  
 AQ 3.9846387 sec  
 RG 203  
 DW 60.800 usec  
 DE 6.50 usec  
 TE 295.1 K  
 D1 1.00000000 sec  
 TD0 1

----- CHANNEL f1 -----  
 NUC1 1H  
 P1 13.00 usec  
 PL1 -2.50 dB  
 PL1W 18.28352737 W  
 SFO1 400.1524711 MHz  
 SI 32768  
 SF 400.1500000 MHz  
 WDW EM  
 SSB 0  
 LB 0.30 Hz  
 GB 0  
 PC 1.00

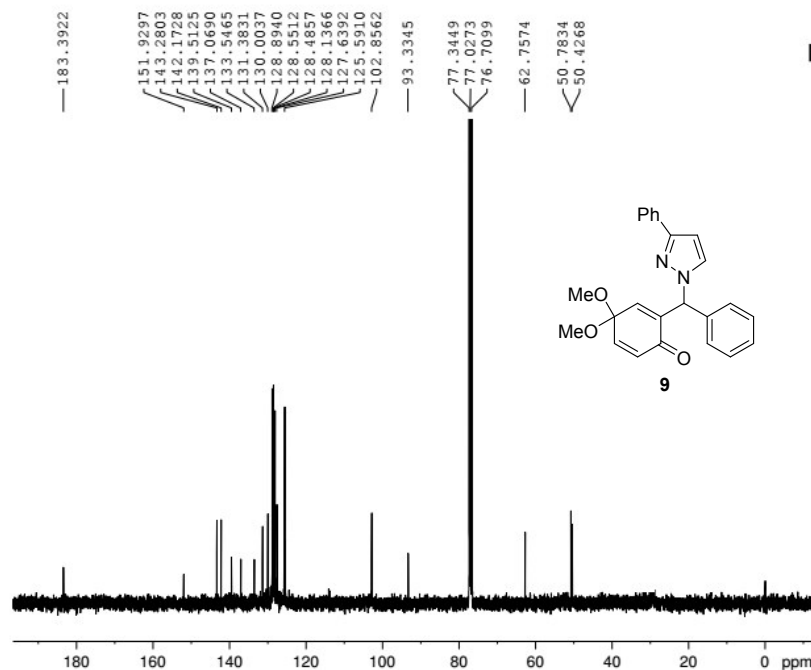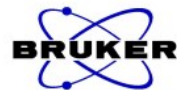

NAME 171025-J3-170901-1  
 EXPNO 2  
 PROCNO 1  
 Date\_ 20171110  
 Time 8.16  
 INSTRUM spect  
 PROBHD 5 mm PABBO BB-  
 PULPROG zgpg30  
 TD 65536  
 SOLVENT CDCl3  
 NS 512  
 DS 0  
 SWH 24038.461 Hz  
 FIDRES 0.366798 Hz  
 AQ 1.3631988 sec  
 RG 194.26  
 DW 20.800 usec  
 DE 6.50 usec  
 TE 300.0 K  
 D1 2.00000000 sec  
 D11 0.03000000 sec  
 TD0 1

----- CHANNEL f1 -----  
 SFO1 100.6228293 MHz  
 NUC1 13C  
 P1 8.54 usec  
 SI 32768  
 SF 100.6127685 MHz  
 WDW EM  
 SSB 0  
 LB 1.00 Hz  
 GB 0  
 PC 1.40

## VI-Structure of compound 4I

CCDC 1582529 (compound **4I**) contains the supplementary crystallographic data for this paper. These data can be obtained by free of charge on application to the Director, CCDC 12 Union Road, Cambridge CB2 1EZ, UK (fax (+44) 1223-336033; or e-mail [deposit@ccdc.cam.ac.uk](mailto:deposit@ccdc.cam.ac.uk)) or via [www.ccdc.cam.ac.uk/data\\_request/cif](http://www.ccdc.cam.ac.uk/data_request/cif)

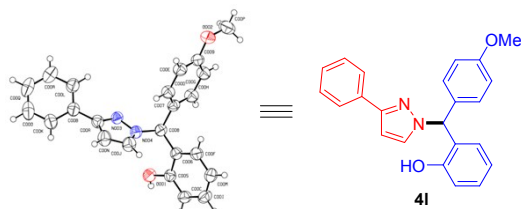

**Table 1.** Crystal data and structure refinement for Compound **4I**

|                                             |                                                               |
|---------------------------------------------|---------------------------------------------------------------|
| Identification code                         | <b>4I</b>                                                     |
| Empirical formula                           | C <sub>23</sub> H <sub>20</sub> N <sub>2</sub> O <sub>2</sub> |
| Formula weight                              | 356.41                                                        |
| Temperature/K                               | 293.1(3)                                                      |
| Crystal system                              | monoclinic                                                    |
| Space group                                 | P2 <sub>1</sub> /c                                            |
| a/Å                                         | 9.34970(18)                                                   |
| b/Å                                         | 9.15478(16)                                                   |
| c/Å                                         | 21.8715(4)                                                    |
| α/°                                         | 90                                                            |
| β/°                                         | 92.8985(15)                                                   |
| γ/°                                         | 90                                                            |
| Volume/Å <sup>3</sup>                       | 1869.68(6)                                                    |
| Z                                           | 4                                                             |
| ρ <sub>calc</sub> /cm <sup>3</sup>          | 1.266                                                         |
| μ/mm <sup>-1</sup>                          | 0.649                                                         |
| F(000)                                      | 752.0                                                         |
| Crystal size/mm <sup>3</sup>                | 0.8 × 0.35 × 0.2                                              |
| Radiation                                   | CuKα (λ = 1.54184)                                            |
| 2θ range for data collection/°              | 9.472 to 145.056                                              |
| Index ranges                                | -11 ≤ h ≤ 11, -7 ≤ k ≤ 11, -17 ≤ l ≤ 26                       |
| Reflections collected                       | 10657                                                         |
| Independent reflections                     | 3641 [R <sub>int</sub> = 0.0325, R <sub>sigma</sub> = 0.0244] |
| Data/restraints/parameters                  | 3641/0/246                                                    |
| Goodness-of-fit on F <sup>2</sup>           | 1.027                                                         |
| Final R indexes [I ≥ 2σ (I)]                | R <sub>1</sub> = 0.0505, wR <sub>2</sub> = 0.1394             |
| Final R indexes [all data]                  | R <sub>1</sub> = 0.0574, wR <sub>2</sub> = 0.1512             |
| Largest diff. peak/hole / e Å <sup>-3</sup> | 0.22/-0.24                                                    |
